## 22 **Introduction**

23 Lysosomes have traditionally been believed as a disposal organelle of the cell. A growing body  
24 of recent studies have implicated lysosomes as centers of cellular nutrient recycling (Abu-  
25 Remaileh et al., 2017; Korolchuk and Rubinsztein, 2011; Rabanal-Ruiz and Korolchuk, 2018).  
26 There are growing evidences that lysosomes regulate cellular homeostasis of various metals  
27 like, Cu, Zn and Fe. Polishchuk et al. 2014, Blaby-Haas and Merchant 2014, Kurz et al. 2011,  
28 Kambe 2011). Copper, a transition metal serves as an essential micronutrient for biological  
29 system. It participates in redox reactions in different cellular metabolic pathways shuttling  
30 between Cu(II) and Cu(I) states (Uauy et al. 1998), where Cu<sup>1+</sup> is favored for normal  
31 physiological activities (Fahrni 2013). Several proteins tightly regulate copper homeostasis and  
32 supplies bioavailable copper to the secretory pathway. Excess copper induces oxidative stress  
33 through Fenton reaction and hence is detrimental for living system (Gupta and Lutsenko 2009).  
34 Copper homeostasis is primarily maintained by two Trans Golgi Network (TGN) recycling P-type  
35 ATPase ATP7A (Menkes Disease Protein) and ATP7B (Wilson Disease Protein). ATP7A is  
36 expressed ubiquitously whereas expression of ATP7B is limited to liver, brain and kidney  
37 Telianidis et al. (2013) ATP7B solely functions to maintain the copper homeostasis in  
38 hepatocytes (Muchenditsi et al. 2017). Defects in ATP7B leads to Wilson Disease (WD), a  
39 phenomenon characterized with copper accumulation in liver, brain and other organs  
40 manifesting severe hepatic or neurological symptoms (Huster and Lutsenko 2007).

41 In this study we have attempted to dissect the trafficking itinerary of ATP7B and its mode of  
42 regulation in hepatocytes. At physiological/ basal copper level, ATP7B primarily resides on  
43 membrane of Trans Golgi Network (TGN) and functions in secretory pathway by delivering  
44 copper to Cu dependent ferroxidase enzyme, ceruloplasmin (Lutsenko 2016) within the lumen

45 of TGN. At higher intracellular copper it vesicularizes (Anterograde trafficking), sequestering  
46 copper inside vesicles and exports copper in lysosomes (Polishchuk et al. 2014). What is the  
47 fate of copper in the lysosome is still to be determined. It is possible that the entire copper in the  
48 lysosome is excreted out of the cell by exocytosis. Alternatively, lysosomes may act as  
49 storehouse of bioavailable copper that is tapped as per the requirement of the cell.

50 Since some recent studies have shown that membrane cargoes recycle back from lysosomes  
51 (Seaman 2007; Suzuki and Emr 2018a; Canuel et al. 2008), we examined the fate of ATP7B at  
52 the lysosome. We specifically asked (a) Is ATP7B degraded at the lysosome during its copper  
53 export activity and (b) If not, what is the mechanism that retrieves ATP7B from lysosomal  
54 compartments?

55 Over 300 mutations in ATP7B are associated with WD and are frequently used to understand  
56 regulation and structure-function correlation of ATP7B (Aggarwal et al. 2013); (Gupta et al.,  
57 2005), Ala et al. 2015), Ala et al. 2005), Abdelghaffar et al. 2008), Braiterman et al. 2014), Caca  
58 et al. 2001). These reported disease mutations affect the functioning of ATP7B either by affecting  
59 its copper transporting activity or its trafficking or both (Braiterman et al. 2014, Gupta et al. 2011).  
60 Mentionable is the N41S at N-terminus, a naturally occurring WD mutation, which localizes at  
61 the TGN and basolateral membrane in all copper conditions (Braiterman et al. 2009). Another  
62 disease variant, Arg875 in the A-domain fails to escape ER but can be rescued with copper  
63 supplementation (Gupta et al., 2011).

64 Several proteins govern trafficking and stability of ATP7B (Materia et al., 2012; Jain et al., 2014;  
65 Gupta et al., 2018) that interact directly or indirectly with defined and conserved motifs of the  
66 protein. These motifs influence the directionality of cargo transport between organelles like  
67 Golgi-endosome-plasma membrane. Both ATP7A and ATP7B harbors endocytic di/tri-leucine

68 motif in their C-terminus which facilitates their transport across various compartments (Petris et  
69 al., 1998, Braiterman et al., 2011). Francis et al have demonstrated that di-leucine motif  
70 <sup>1487</sup>LL<sup>1488</sup> of ATP7A to be important for its retrieval from cell membrane (Francis et al. 1999).  
71 Similarly, the ATP7B di-leucine mutant <sup>1454</sup>LL>AA<sup>1455</sup> caused redistribution of ATP7B from TGN  
72 to plasma membrane and dendritic vesicles and loss of somatodendritic polarity in rat  
73 hippocampal primary neurons (Jain et al. 2014).

74 Although the anterograde pathway of ATP7B has been moderately characterized (Gupta et al.  
75 2016, Gupta et al. 2018), the regulation which mediates its retrograde transport from lysosomes  
76 has been elusive. Recent studies have shown that retromer regulates retrieval or rescue of  
77 cargoes from endosomal and lysosomal compartments (Burd and Cullen, 2014; Gershlick and  
78 Lucas, 2017; Lucas and Hierro, 2017; Tammineni et al., 2017). Retromer is a highly conserved  
79 endosomal sorting complex, composed of core components, VPS35, 26 and 29 and variable  
80 components, Sorting Nexins (SNX) and WASH complex, that are involved in the retrieval and  
81 retrograde transport of endocytosed transmembrane proteins (cargoes) to the trans-Golgi  
82 network (TGN) or cell surface (Seaman, 2018; Suzuki et al. 2019). The ATP7B homologue,  
83 ATP7A, has been shown to be regulated by SNX27 (Cullen and Korswagen, 2012; Steinberg et  
84 al., 2013). In rat primary neurons SNX27, a variable member of the retromer complex, rescues  
85 neuroligin 2 from lysosomal degradation (Binda et al., 2019). Similarly, SNX17 protects integrin  
86 from degradation by sorting between lysosomal and recycling pathways, though retromer is not  
87 directly involved. Recycling of CI-M6PR, the protein which delivers acid hydrolases to lysosome,  
88 to TGN is dependent on Retromer (Seaman, 2007). Studies from Emr group have shown that in  
89 yeast proteins like autophagy protein Atg27 is recycled from vacuole to the endosome via the  
90 Snx4 complex and then from the endosome to the Golgi via the retromer complex (Suzuki and

91 Emr 2018b). Further they have also demonstrated that both VPS26 and VPS35 are critical in  
92 cargo retrieval; however VPS26 utilizes different binding sites depending on the cargo, allowing  
93 flexibility in its cargo selection (Suzuki et al., 2019) . Besides TGN delivery, retromers also  
94 regulate endosome-to-plasma membrane recycling as in Ankyrin-repeat domain 50, ANKRD50  
95 (McGough et al. 2014).

96 In this study, we have demonstrated that the recycling Cu-P-type ATPase, ATP7B, whose  
97 localization in the cell is dictated by intracellular copper levels, recycle from lysosome to TGN  
98 upon copper removal and this phenomenon is regulated by the retromer. We have demonstrated  
99 that similar to as in case of an endocytic cargo (Mellado et al., 2014, Tabuchi et al., 2009)  
100 retromer also sorts a secretory cargo, i.e., ATP7B for its TGN delivery from lysosomes and late  
101 endosomes.

## 102 **Results**

### 103 **ATP7B recycles between Lysosomes and Trans Golgi Network in a copper dependent** 104 **manner**

105 ATP7B vesicularizes from trans-Golgi network in response to high copper. To determine the  
106 optimal time of complete retrieval of ATP7B from vesicles to TGN, HepG2 cells (human  
107 hepatocellular carcinoma cell line) were treated with high copper (50 $\mu$ M; 2h) and subsequently  
108 treated with 50 $\mu$ M BCS for varying time periods (10min, 30min and 2h). Gradual increase in  
109 colocalization between TGN and ATP7B was observed with 10 min, 30 mins and 2h of BCS  
110 treatment as evident from Pearson's Colocalization Coefficient (PCC). At 2h, maximum TGN  
111 retrieval of ATP7B was observed (Fig. 1, A and B).

112 Polishchuk et al have demonstrated that ATP7B utilizes lysosomal exocytosis to export copper  
113 (Polishchuk et al., 2014). We investigated if ATP7B degrades at the lysosome after it transports  
114 copper or it recycles back from lamp1 positive lysosomal compartments for a next round of  
115 export cycle. We treated the cells with either BCS (50 $\mu$ M) or increasing amounts of copper  
116 (50 $\mu$ M and 250 $\mu$ M). Using immunofluorescence assay we determined that under high copper  
117 conditions ATP7B exits TGN and colocalizes with Lamp1 and to a lesser extent with Rab7  
118 positive compartments (Fig. 2, A and B and Fig. S1, A and B). Upon treatment with 250uM  
119 copper, a drop of ATP7B protein abundance was observed compared to the two other  
120 experimental conditions indicating possible degradation (Fig. 2, C and D). Upon triggering the  
121 retrograde pathway with BCS for 30 mins (50 $\mu$ M), for cells that were pre-treated with 50uM  
122 copper, we noticed loss of colocalization of lamp1 and ATP7B, indicating lysosomal exit of  
123 ATP7B upon copper chelation (Fig. 2A). We did not observe appreciable colocalization of  
124 recycling marker, Rab11 and ATP7B (Fig. S1C). Interestingly irrespective of copper treatment  
125 we observed a fraction of ATP7B consistently colocalizing with lamp1.

126 Lamp1 typically marks the terminal end of the endo-lysosomal pathway (Humphries et al., 2011),  
127 but frequently, Rab7 and Lamp1 also co-labels the common non-degradative lysosomal  
128 compartment (Cheng et al., 2018). To determine the percentage distribution of ATP7B in the  
129 milieu of lysosomes-late endosomal compartments (lamp1-Rab7), we utilized Structured  
130 Illumination Microscopy (SIM) along with deconvolution confocal microscopy imaging. At  
131 elevated copper (50 $\mu$ M) we found a proportionately higher co-distribution of ATP7B with  
132 compartments positive for both Rab7 and Lamp1 than compartments positive for individual  
133 unique markers. At this condition,  $48.5\% \pm 13.2$  of total ATP7B colocalized with either Lamp1 or  
134 Rab7 or both. Among them,  $44.9\% \pm 14$  of ATP7B localized in vesicles positive for both Lamp1

135 and Rab7. Hence, it may be inferred that recycling of ATP7B to TGN upon Cu chelation is largely  
136 from non-degradative transitory type vesicles which are positive for both the markers than  
137 classical lamp1-only lysosomal compartments (Fig. 3, A and B). Together this result suggests  
138 that ATP7B localizes at late endo-lysosomal compartments at high copper. However, at this  
139 point we could not determine whether the retrograde pathway of ATP7B can also originate  
140 exclusively from lysosomal or late endosomal compartments.

141 It is worth mentioning that the size and shapes of the lysosomal compartments (Lamp1 +) are  
142 variable across cells and as well as in a single cell. It varies from 20-200 $\mu$ M in diameter  
143 (maximum length across) and shape varies from small puncta to larger patchy clumps. We did  
144 not notice any correlation between size and shape of the compartment with the treated  
145 copper concentration or the passage number of the cell.

#### 146 **Retromer regulate retrograde trafficking of ATP7B from lysosome and late endosome**

147 ATP7B exits lysosomes by an unknown regulatory mechanism upon copper chelation. It has  
148 been shown that Menkes disease protein, ATP7A, the homologue of ATP7B require SNX27-  
149 retromer to prevent lysosomal degradation and maintain surface levels and localization  
150 (Steinberg et al., 2013) . Also, CI-M6PR (a constitutive lysosomal recycling cargo) recycles to  
151 TGN from lysosomes in a retromer regulated fashion (Arighi et al., 2004; Cui et al., 2019). This  
152 prompted us to investigate if the retromer complex plays a role in retrieval of ATP7B (a non *bona*  
153 *fide* lysosomal cargo) from lysosome and late endosomal compartments. VPS35 is the largest  
154 core component of the retromer complex. It functions as the scaffold for the assembly of other  
155 core components, VPS29 and VPS26 and also cargo binding (Hierro et al., 2007). Hence, we  
156 selected hVPS35 as the target component to determine the role of retromer complex, if any in  
157 copper mediated trafficking of ATP7B.

158 Broadly, localization and trafficking of ATP7B in HepG2 can be divided in 4 *phases* (a) at the  
159 TGN in Basal Cu (or –Cu), (b) on the anterograde vesicles in high Cu and (c) on the retrograde  
160 vesicles in high Cu > Cu chelated conditions (10 mins BCS treatment) and (d) majority of ATP7B  
161 back to the TGN in high Cu > Cu chelated conditions (30 mins/2h BCS). Immunoblot analysis of  
162 VPS26 and VPS35 revealed that HepG2 cells expresses the retromer complex proteins (Fig.  
163 4A) and copper does not alter abundance of VPS35 in HepG2 cells (Fig. S2A)

164 To study if ATP7B co-localizes with retromer core components, cells were treated with either of  
165 the 4 conditions described above. Cells were fixed, blocked and co-stained with anti-ATP7B and  
166 anti-VPS35 or anti-VPS26 antibody. Maximum colocalization as quantified by Pearson's  
167 Colocalization Coefficient between VPS35 and ATP7B was observed in Cu (2h)>BCS (10min)  
168 (*phase c*) followed by high copper condition (*phase b*) condition. Further with 30 min BCS  
169 treatment post high copper (*phase d*), ATP7B and VPS35 shows loss of colocalization (Fig. 4,  
170 B and C). Similar observations were made with VPS26 (data not shown).

171 To further understand if retromer regulates any of these phases of ATP7B trafficking, we  
172 knocked down VPS35 and studied the phenotype of copper induced localization of ATP7B with  
173 respect to TGN. Appreciable knockdown was attained (>70-80%) for the targeted siRNAs as  
174 compared to scrambled for VPS35 as ascertained by immunoblotting (Fig. 5A). Furthermore, as  
175 reported by (Fuse et al.,2015) decrease in expression of VPS26 was also observed in VPS35  
176 KD cell which eventually tells us expression as well as functionality of VPS subunits are  
177 interdependent (Fig. S2B).

178 VPS35 siRNA treated cells were incubated with (a) BCS or (b) Copper or (c) Copper > BCS (30  
179 min), fixed, blocked and stained with the anti-ATP7B and anti-Golgin97 antibodies. We observed  
180 that trafficking of ATP7B from the vesicles back to the TGN (*condition c*) was significantly



181 abrogated (Fig. 5, B and C and Fig. S2C). ATP7B remained in vesicles and failed to recycle  
182 back to TGN even after the cells were incubated in BCS for a prolonged time of 2h subsequent  
183 to copper treatment (not shown).

184 To corroborate our finding that VPS35 regulates ATP7B trafficking, we utilized the wild type and  
185 the inactive dominant negative mutant mCherry-VPS35 (R107A) (gift from Dr, Sunando Datta,  
186 IISER Bhopal). The R107A mutation abolishes the interaction of VPS35 with VPS26 and affects  
187 cargo sorting. (Gokool et al., 2007; Zhao et al., 2007) . Cells were co-transfected with GFP-  
188 ATP7B and mCherry-wt-VPS35 and GFP-ATP7B was concentrated at TGN (perinuclear region)  
189 with copper chelator. Vesicularization and recycling of ATP7B was triggered with treatment with  
190 copper. Image capture was initiated at the point of copper treatment and data was collected at  
191 an interval of 1.93 second for a total period of 30 mins. We noticed that within 1 min of Cu  
192 treatment, GFP and m-Cherry signals colocalized at the same endosomal vesicle. The dwell  
193 time of wt-VPS35 and GFP-ATP7B on the vesicle was significantly higher for wt-VPS35  
194 compared to the mutant. For VPS35-R107A, the colocalization lasted for few seconds (4-11  
195 seconds) but for wt-VPS35, the colocalization lasted for an average of 7 mins. (Video 1, A and  
196 B) and (Fig. S3, A and B).

197 Since we determined that ATP7B colocalizes at the lysosomes at high copper, we investigated  
198 if VPS35 regulates lysosomal exit of ATP7B on triggering its retrograde pathway. Using identical  
199 experimental conditions of knocking down VPS35, we found that ATP7B is arrested at lysosome  
200 upon triggering the retrograde pathway (i.e., high copper > BCS) (Fig. 5D). Interestingly,  
201 boosting the retrograde pathway by lengthening BCS treatment time to 2h did not facilitate  
202 retrieval of ATP7B from the lysosomes (Fig. 5D). Also, in VPS35 kd cells, a population of ATP7B

203 was arrested in late endosome (Rab7 positive) upon activating the retrograde pathway (Fig.  
204 S2C).

205 We confirmed the role of retromer by rescuing the non-recycling phenotype of ATP7B in VPS35  
206 kd cells by overexpressing mcherry-wt-VPS35. We found that ATP7B recycled back from  
207 vesicular to its tight perinuclear TGN localization upon copper chelation in VPS35 kd cells that  
208 overexpressed the wt-VPS35 construct (Fig. 5E). These experiments confirm that VPS35  
209 regulates retrieval of ATP7B from lysosomes (and also possibly from late endosomes) to TGN  
210 upon copper depletion.

### 211 **Lysosomal luminal pH does not influence localization of ATP7B and recruitment of VPS35**

212 It emerges that copper induced localization of ATP7B involves a tripartite participation, i.e.,  
213 ATP7B, lysosome and retromer. After confirming the role of VPS35 in this process, we asked if  
214 luminal lysosomal environment affect retromer recruitment and hence ATP7B retrieval from  
215 lysosome. Retromers have been previously implicated in lysosomal activity e.g., autophagy (Cui  
216 et al., 2019) . We investigated if the targeting of ATP7B to lysosomes in high copper or its  
217 retrieval initiation by VPS35 recruitment is affected by inactivation of the V-ATPase that is crucial  
218 for lysosomal functioning. Cells were treated with the V-ATPase inhibitor, BafA1, in 50 $\mu$ M copper  
219 (to trigger lysosomal targeting of ATP7B) and Cu>BCS (20 mins) conditions (to trigger its  
220 lysosomal exit). No observable and significant difference in colocalization of Lamp1, ATP7B and  
221 VPS35 was obtained between BafA1 treated vs the control in either condition. It can be inferred  
222 that retromer being situated on the outer membrane of the Lamp1 positive compartments is  
223 unaffected by the change in luminal pH of the lysosome brought on by BafA1 treatment.  
224 Localization of ATP7B also stays unaltered as also demonstrated by Polishchuk et al. (Fig. 6)

## 225 **ATP7B N-terminal <sup>41</sup>NVGY<sup>44</sup> (NXXY motif) mutant phenocopies VPS35 knockdown**

226 We wanted to identify the ATP7B motif(s) that regulates its retrograde trafficking. Since, there  
227 are no signature retromer regulatory motifs on cargoes yet reported, at the outset, we did an  
228 unbiased search using published literatures of sorting signals. We found 3 strong sorting motifs,  
229 one on N-terminal (<sup>41</sup>NXXY<sup>44</sup>) and two on the C-terminal (<sup>1376</sup>YXX $\phi$ <sup>1384</sup> and <sup>1454</sup>LLL<sup>1456</sup>) that are  
230 conserved across species (Fig. S4A). The YXX $\phi$  is repeated thrice in tandem (1373-1384  
231 residue). We mutated the three N and C terminal motifs (Table S4B) and observed if any of  
232 these mutants phenocopy trafficking behavior of ATP7B in VPS35 knocked down cells. The  
233  $\Delta$ NVGY-ATP7B localizes at the TGN in BCS and traffics to lysosomes (Lamp1+ and VPS35+)  
234 at high copper. Interestingly, it fails to recycle back to the TGN when copper is chelated by BCS,  
235 a phenotype identical to VPS35 KD condition (Fig. 7). The C-terminus <sup>1454</sup>LLL<sup>1456</sup>>AAA mutant  
236 as previously reported constitutively vesicularizes in all the three condition (Braiterman et al.,  
237 2011). The second C-terminus mutant  $\Delta$ YXX $\phi$  shows primarily ER like staining with some  
238 vesicles in all the three conditions. Hence we did not proceed further with C-terminal mutants  
239 (Fig. S4C). From the phenocopy experiment we can infer that retrograde trafficking of ATP7B is  
240 most likely regulated via the NXXY (NVGY in ATP7B) motif of N-terminus. The NVGY motif  
241 harbors a Wilson Disease mutation (N41S) that has been shown to be missorted in high copper  
242 conditions (Braiterman et al., 2009) . We also found that though the level of expression was  
243 lower than the wt-ATP7B, ATP7B-N41S faithfully replicates the non-returning phenotype as  
244 observed in VPS35 knockdown condition (Fig. S4C). In copper limiting condition it primarily  
245 localized to TGN and a few vesicles. In addition, on mutating the other invariant residue Tyr<sup>44</sup>,  
246 i.e., Y44V and the putative phosphomimetic Y44D, ATP7B exhibited ER localization (Table.  
247 S4B).

248 **VPS35 acts on ATP7B in a micro-distant *modus operandi***

249 Next, using biochemical assays we investigated if VPS35 directly interacts with N terminus of  
250 ATP7B (harboring NXXY motif). The GST-tagged 1-650 amino acid (with all 6 MBRs) N-terminus  
251 ATP7B construct (+Cu and –Cu) that was used as bait was immobilized on GSH beads to fish  
252 out VPS35 from HepG2 lysate. On probing with anti-VPS35 antibody, we failed to detect any  
253 interaction. The C-terminus ATP7B was used as a negative control (Fig. S5A, i-vi). Further we  
254 utilized co-immunoprecipitation where GFP-ATP7B was expressed in cells, pulled down with  
255 anti-GFP beads and probed for endogenous VPS35. We did not observe any interaction (Fig.  
256 S5B, vii-viii).

257 To understand the underlying reason of why we could not detect interaction between ATP7B  
258 and VPS35 using biochemical methods, we resorted to Super resolution microscopy to  
259 determine the exact positioning of ATP7B w.r.t VPS35 at the lysosomal compartment. Using  
260 Structured Illumination Microscopy and High resolution deconvolution confocal microscopy we  
261 observed that ATP7B and VPS35 lies in juxtaposition on the lysosomal compartment (stained  
262 with Lamp1 antibody) at high copper conditions (Fig. 8, A-D). The average distance between  
263 these two proteins varies from 25nm~200nm. It can be inferred that although ATP7B lies in close  
264 proximity to VPS35 and is regulated in its retrograde pathway by retromer, the physical  
265 interaction between these two proteins are indirect. We utilized Stimulated Emission Depletion  
266 (STED) microscopy to look further closely on the disposition of ATP7B and Vps35 on a vesicular  
267 membrane. Using Z-stacking we determined the shape of a vesicle (dotted circle in Fig. 8E) and  
268 observed that ATP7B (green) and Vps35 (red) decorated the vesicular membrane with minimal  
269 signal overlap (yellow) at a maximum resolution of 25nm further substantiating our biochemical  
270 findings.

271 In summary we establish that, ATP7B traffics to lysosomes at high copper where it juxtaposes  
272 with VPS35, the core member of the retromer complex. Upon triggering the retrograde pathway  
273 by subsequent copper chelation, retromer regulates the recycling of ATP7B from the lysosome  
274 to the TGN (Fig. 9).

## 275 **Discussion:**

276 The copper transporting ATPase, ATP7B exports copper through lysosomes. ATP7B (160kDa)  
277 is a large 8 membrane spanning protein with a total of 1465 residues. ATP7B resides on the  
278 TGN membrane at basal copper levels and traffics to lysosomes and Rab7 compartments at  
279 high copper. We argue that it would be highly wasteful for the cell to degrade ATP7B after each  
280 cycle of copper export from the TGN to the lysosomes. We wondered whether ATP7B recycles  
281 back from the lysosome after it pumps copper in the lysosomal lumen for either export out of the  
282 cell or for reutilization as a nutrient that requires to be investigated. Interestingly, the protein  
283 does not get degraded unlike most other cargoes that are destined for degradation at the  
284 lysosomes. The luminal loops of ATP7B between the 8 TM domains are small and probably  
285 escapes lysosomal hydrolases. Also, low pH in lysosomal lumen might help the release of  
286 copper from the His residues that are located between TM1-TM2 loop as shown in its homologue  
287 ATP7A (Barry et al., 2011; LeShane et al., 2010; Otoikhian et al., 2012) and binds copper.

288 Further we asked what might be the regulator(s) that affects ATP7B's recycling back from the  
289 lysosome. In a preliminary proteome analysis on GFP-ATP7B vesicles isolated from HepG2 cells  
290 (data not shown), we have identified members of the retromer complex. Previously (Harada et  
291 al., 2000) had shown that ATP7B resides in late endosome (Rab7 positive) in high copper.  
292 Retromer on the other hand is recruited on endosomal membrane by sequential action of Rab5  
293 and Rab7 (Rojas et al., 2008). Further, Priya et al., 2015 dissected the interaction of Rab7 and

294 retromer complex and demonstrated that Rab7 recruits retromer to late endosomes via direct  
295 interactions with N-terminal conserved regions in VPS35.

296 Before investigating the role of retromer in retrieval of ATP7B from lysosomes, we first  
297 determined if ATP7B is stable in lysosomal and Rab7 compartments. Interestingly it was  
298 reported by Polishchuk et al, that even up to 200uM copper treatment in HepG2 cells, ATP7B  
299 shows no significant degradation. However, we noticed a drop in ATP7B abundance indicating  
300 degradation at 250uM copper at 2 hrs though the cellular architecture apparently looks normal  
301 under phase contrast microscope. At 50µM copper, ATP7B did not exhibit any degradation.

302 Upon examining triple-colocalization of ATP7B, VPS35 and Lamp1 in fixed cells, we notice that  
303 the level of overlap is moderate at high copper. This might be attributed to the fact that at a given  
304 point in copper treated cells, the nature of vesicles are highly heterogeneous comprising of  
305 retrograde and anterograde vesicles and that too at various stages of trafficking. We hypothesize  
306 that the lysosomes would exhibit a higher co-residence of VPS35 and ATP7B if we are able to  
307 synchronize the TGN exit (upon copper treatment) and lysosomal exit (upon subsequent copper  
308 removal) of ATP7B. However, time lapse imaging showed that GFP-ATP7B and mCherry-Vps35  
309 colocalizes in the compartment for a few minutes. In VPS35 kd cells, ATP7B is trapped in the  
310 lysosomes even upon activating the retrograde pathway (Copper>BCS). We reason that ATP7B  
311 recycles back to TGN from the lysosomes directly and not via plasma membrane as we did not  
312 observe ATP7B staining at the plasma membrane or even at the cortical actin (data not shown).

313 Interestingly, we did not detect any direct interaction of ATP7B and VPS35 (or VPS26). This is  
314 possibly due to the fact that though retromer complex regulates lysosomal exit of ATP7B, the  
315 interaction is mediated via a different member of the complex. Retromer complex shows  
316 heterogeneity in its subunits that are responsible for binding to the cargo (Follett et al., 2016;

317 Zhang et al.,2012; Suzuki et al., 2019; Belenkaya et al., 2008; Feinstein et al., 2011). It has  
318 been shown that the canonical recycling signal for the Divalent Cation Transporter (DMT1-II)  
319 binding of retromer is mediated via the interface of VPS26 and SNX3 in a hybrid structural model  
320 shows that the  $\alpha$ -solenoid fold extends the full length of Vps35, and that Vps26 and Vps29 are  
321 bound to its two opposite ends (Lucas et al., 2016; Hierro et al., 2007). This extended structure  
322 suggests that multiple binding sites for the SNX complex and receptor cargo are present. It has  
323 been shown show that membrane recruitment of retromer is mediated by recognition of SNX3  
324 and RAB7A, by the VPS35 subunit. These bivalent interactions prime retromer to capture  
325 integral membrane cargo, which enhances membrane association of retromer and initiates cargo  
326 sorting (Zhao et al., 2007). Further studies are needed to be carried out to identify the exact  
327 interface of ATP7B-retromer interaction.

328 How copper (or copper removal) mediates triggering of ATP7B's retrograde pathway is not  
329 understood. It is likely that copper binding to the 6 MBD on ATP7B N-terminus, exposes the  
330 upstream 1-63 N-terminal domain containing the <sup>41</sup>NXXY<sup>44</sup> domain. This relaxed N-terminus 1-  
331 63 conformation might be favorable for it to interact with the retromer complex. We demonstrate  
332 in our phenocopy experiments that mutations on this domain traps the protein in lysosomes. As  
333 also determined in our experiments, it is unlikely that motifs on the C-terminal (tandem  
334 <sup>1373</sup>YXX $\phi$ <sup>1384</sup> and <sup>1454</sup>LLL<sup>1456</sup>) or other cytoplasmic domains would be serve as copper dependent  
335 retromer regulatory motifs of ATP7B due to lack of any copper binding sites in its proximity.  
336 However, role of C-terminus cannot be completely discounted as Braiterman et al has shown  
337 that multiple regulatory phosphorylation sites lie on the C-terminus that might play an indirect  
338 role in regulation of ATP7B by retromer complex (Braiterman et al., 2015).



339 Wilson disease, though a Mendelian disorder caused by mutations only in *ATP7B* gene, shows  
340 a large spectrum of symptoms and age of onset. We hypothesize that polymorphisms and  
341 mutations in trafficking regulatory proteins might be responsible for imparting such high  
342 phenotypic heterogeneity. Mutations and SNPs in the retromer subunit genes are associated  
343 with many hereditary conditions (Reitz 2018; Small 2008; Chen et al., 2017; Rahman and  
344 Morrison 2019; Shannon et al., 2014). Varadarajan et al, reported significant association of  
345 SNPs of retromer complex genes (SNX1, SNX3 and Rab7A) with Alzheimer's disease  
346 (Varadarajan et al., 2012) Similarly, *VPS35* hemizygous condition accentuates Alzheimer's  
347 disease neuropathology (Wen et al., 2011). Additionally, Parkinson's disease-linked *D620N*  
348 *VPS35* knockin mice manifest tau neuropathology and dopaminergic neurodegeneration (Chen  
349 et al., 2019). It would be important to extend the knowledge of role of retromers in *ATP7B*  
350 trafficking to delineate genotype-phenotype relationship in Wilson disease patients.

### 351 **Acknowledgments**

352 This work was supported by Wellcome Trust India Alliance Fellowship (IA/I/16/1/502369) and  
353 Early Career Research Award (ECR/2015/000220) from SERB, Department of Science and  
354 Technology (DST), Government of India and IISER K intramural funding to AG. SM and IB was  
355 supported by Pre-doctoral fellowship from Council of Scientific and Industrial Research, India.  
356 TS was supported by National Postdoctoral Fellowship, SERB, India. We thank Dr. Ashima  
357 Bhattacharjee for critical review of the manuscript.

358 Author contributions: AG and SD designed the experiments and wrote the manuscript. SD,  
359 Ruturaj and TS did the experiments and analyzed the data. SM wrote the codes and analyzed  
360 the data. Ruturaj helped with time-lapse imaging. IB conducted the experiments with the *ATP7B*



361 mutants. Dr. Anupam Banerjee (Zeiss) helped us with SIM imaging at JNCASR. STED  
362 microscopy was carried out at the Leica microscopy facility at IISER Pune. All authors reviewed  
363 the results and approved the final version of the manuscript.

364 We thank Rahul Das (IISERK), Arindam Mukherjee (IISERK), Oishee Chakrabarti (Saha Inst of  
365 Nuclear Physics), Ashima Bhattacharjee (Amity Univ. Kolkata) for sharing their reagents and  
366 instruments with us.

367 The authors declare no competing financial interests.

368

369

## 370 **Materials and methods**

### 371 **Plasmids and reagents**

372 GFP-ATP7B construct was available in lab. The mCherry WT-VPS35 and mCherry VPS35  
373 (*R107A*) construct was kindly gifted by Dr. Sunando Datta, IISER Bhopal, India. pET28aSUMO  
374 and pGEX vectors was kindly gifted by Dr. Rahul Das, IISER-Kolkata, India. Following are the  
375 antibodies that has been used for experiments: rabbit anti-ATP7B (# ab124973), mouse anti-  
376 golgin97 (# A21270), goat anti-VPS35 (# NB 100-1397), mouse anti-VPS26 (# NBP 236754),  
377 mouse anti-VPS35 (# sc-374372); for western blot, mouse anti-Lamp1 (DSHB: # H4A3), mouse  
378 anti-Rab7 (# sc-376362), Donkey anti-Rabbit IgG (H+L) Alexa Fluor 488 (# A-21206), Goat anti-  
379 Rabbit IgG (H+L) Alexa Fluor Plus 647 (# A32733), Donkey anti-Mouse IgG (H+L) Alexa Fluor  
380 Plus 647 (# A32787), Donkey anti-Goat IgG (H+L) Alexa Fluor 568 (# A-11057), Donkey anti-  
381 Mouse IgG (H+L) Alexa Fluor 568 (# A10037). Endo toxin free plasmid isolation was done using  
382 EndoFree Plasmid Maxi Kit (# 12362).

### 383 **Cell lines and cell culture**

384 HepG2 cells were grown and maintained in complete medium containing low glucose Minimum  
385 Essential Medium (MEM) (# 41500-034) supplemented with 10% Fetal Bovine Serum (# 10270-  
386 106), 1X Penicillin-Streptomycin (# A001), 1X Amphotericin B (# 15290026). Similarly HEK293T  
387 cells were grown and maintained in Dulbecco's modified Eagle's medium (DMEM) (#  
388 CC3004.05L) supplemented with 10% Fetal Bovine Serum, 1X Penicillin-Streptomycin, 1X  
389 Amphotericin B. For transfection of plasmids in HepG2 cell, Lipofectamine 3000 reagent (#  
390 L3000-001) was used according to manufacturer's protocol. For transfection in HEK293T, for  
391 live cell imaging, JetPrime (# 114-07) transfection reagent was used.

## 392 **Knockdown assays**

393 Accell Human VPS35 (55737) siRNA-SMARTpool (#E-010894-00-0010), Accell Non-targeting  
394 siRNA (#D-001910-01-05), Accell siRNA Delivery Media (#B-005000-100), 5X siRNA Buffer (#B-  
395 002000-UB-100) and Molecular Grade RNase-free water (#B-003000-WB-100) were purchased  
396 from Dharmacon. HepG2 cells were seeded in complete medium at a density of  $1.5 \times 10^5$  cells/ml  
397 in coverslips heat fixed on 24-well plate. Cells were allowed to double for approx. 48hrs (doubling  
398 time of HepG2). After 48 hours, media was discarded, rinsed with 1X PBS pH 7.4 and si RNAs  
399 were added at a final concentration of  $1 \mu\text{M}$  resuspended in Accell siRNA Delivery Media (# B-  
400 00-5000-100). This condition was maintained for 72 hours after which the si-RNA containing  
401 media was replaced with complete media and again maintained for another 24 hours. This  
402 ensures better knock down at protein level. To validate knock down of VPS35, western blot was  
403 performed following same protocol from one well of 24 well plate.

## 404 **Immunofluorescence**

405 HepG2 cells were seeded at a density of ( $0.8-1.6 \times 10^5$  cells/ml) on coverslips heat fixed on wells  
406 of 24 well plate each time while conducting immunofluorescence. Any treatment was performed  
407 at a confluency of (60-70) %, including transfection. 4% Para-formaldehyde (PFA) fixation was  
408 done following treatment. After fixation cells were permeablized with chilled methanol and finally  
409 washed with 1X PBS. Fixation and permeabilisation was carried out in cold condition. Cells were  
410 blocked in 3% BSA suspended in 1X PBS for either 2hours at room temperature (RT) or O/N at  
411  $4^\circ\text{C}$ . Following this, primary antibody ( $1^0$ ) incubation was done at RT in moist chamber for  
412 2hours. After  $1^0$  incubation, cells were washed with 1X PBST for 3 times and again re-incubated  
413 with corresponding secondary antibodies ( $2^0$ ) for 1.3 hours at RT. This was followed by further  
414 washing with 1X PBST for 3 times and finally with 1X PBS for two times. Coverslips were fixed

415 on glass slides using SIGMA Fluoroshield™ with DAPI mountant. (#F6057). The solvent for  
416 antibody suspension was 1% BSA in 1X PBST.

417 For STED sample preparation, HepG2 cells were seeded on glass coverslips, treated with BCS  
418 and copper (as mentioned in Fig. 8E). Treatment was done at 70% confluency. Cell were fixed  
419 with 2% PFA for 20mins followed by washing with 1X PBS, pH 7.2 for 15mins (× 2) and then  
420 quenched with 50mM NaCl. Blocking and permeation was done for 30mins with 1% BSA along  
421 with 0.075% saponin. Cell were co-incubated with primary rabbit anti-ATP7B and goat anti-  
422 VPS35 for 2hrs at room temp. Followed by 1X PBS washing and incubation with secondary anti-  
423 rabbit Alexa 488 and anti-goat Alexa 647. Coverslips was mounted with ProLong™ Diamond  
424 Antifade Mountant with DAPI (# P36962).

#### 425 **Time-lapse fluorescence microscopy**

426 HEK293T cells were seeded on confocal dishes (SPL) and were co-transfected separately with  
427 GFP-ATP7B and mCherry-VPS35-WT, mCherry-VPS35-MT(R107A) (gift by Sunando Datta,  
428 IISER Bhopal), using jetPRIME (Polyplus) transfecting reagent as per manufacturer protocol.  
429 Images were acquired using Leica SP8 confocal setup with 63x oil objective. For ATP7B &  
430 VPS35-WT/MT, images were taken at every 1.964 s interval using Lightning by Leica .All the  
431 images were processed using Fiji and LASX software provided by Leica and videos were  
432 processed using Cyberlink Powerdirector.

#### 433 **Co-purification assays and co-immunoprecipitation:**

434 Copurification: Composition of bacterial lysis buffer for N-term and C-term ATP7B: 50mM Tris-  
435 Cl, 50mM NaCl, 5mM EDTA, 10% glycerol (5% for C-term), ~1mM beta-mercaptoethanol, pH-

436 8.0. Same buffer was used for the washing after incubation of lysates with beads. Composition  
437 of HepG2 cell lysis buffer: 1X PBS buffer with 250mM sucrose, 1mM EDTA, 1mM EGTA, 1mM  
438 PMSF and 1X protease inhibitor cocktail. Same buffer was used for the washing after incubation  
439 of lysates with beads. Wt-C-term and Wt-N-term ATP7B were cloned into the pET28aSUMO and  
440 pGEX vectors respectively followed by transformation into competent BL21 E.coli for the  
441 bacterial expression of the proteins. BL21 containing Wt-N-term ATP7B was grown in Luria broth  
442 in presence of 100µg/ml ampicillin whereas BL21 containing Wt-C-term ATP7B was grown in  
443 nutrient broth in presence of 50µg/ml kanamycin followed by induction with 1mM isopropyl β-D-  
444 thiogalactopyranoside (IPTG) at 18°C and 37°C respectively for 16hr. BL21 and empty pGEX  
445 were used as negative control for C-term and N-term ATP7B co-purification respectively. Cells  
446 were resuspended in lysis buffer and lysed by sonication (100 amplitude/10 sec on/30 sec off) x  
447 7 to 8 cycles. Bacterial lysates (collected from 100ml culture) were incubated with the Ni-  
448 sepharose (for C-term) and GSH Beads (for N-term) for 3hr at 4°C followed by washing using  
449 respective buffers. HepG2 pellet (collected from 10mm dish) was lysed by sonication (100  
450 amplitude/10 sec on/30 sec off) x 5 cycles using respective lysis buffer for C-term and N-term  
451 co-purification. Insoluble materials were sedimented at 13,200rpm for 20mins at 4°C and  
452 supernatant was incubated with beads for 3hr at 4°C followed by elution with 3XSDS-PAGE  
453 loading buffer. Eluted products were used for western blotting using anti-VPS35 and anti-VPS26  
454 antibodies.

455 Co-immunoprecipitation: All solutions were pre-chilled to 4°C and all steps were carried out on  
456 ice. HEK293T cells were transfected with GFP-ATP7B and treated with different Cu conditions  
457 followed by washing with 1x PBS and lysis using lysis buffer (10mM Tris-Cl pH 7.5, 150mM  
458 NaCl, 0.5mM EDTA, 0.5 % NP40, PMSF and protease inhibitor cocktail in ddH<sub>2</sub>O). Cell extracts

459 were triturated with 2ml syringe and incubated for total 45minutes and the insoluble materials  
460 were sedimented at 16,000g for 10 min at 4°C. Co-IP experiment was performed using GFP-  
461 trap beads (ChromoTek, # gta-20) following the manufacturer protocol. The supernatants were  
462 diluted using diluted buffer (10mM Tris-Cl pH 7.5, 150mM NaCl, 0.5mM EDTA, PMSF and  
463 protease inhibitor cocktail in ddH<sub>2</sub>O to yield 0.25 % NP40) and incubated with GFP-trap beads  
464 for 2hr at 4°C on a rotating wheel. Finally the interacting proteins were eluted using 0.2M glycine  
465 and used for western blotting. Western blotting of VPS35, VPS26 and GFP: Samples for Western  
466 blotting were resolved by sodium dodecyl sulphate-polyacrylamide gel electrophoresis (SDS-  
467 PAGE) and separated proteins were transferred to nitrocellulose membrane. After protein  
468 transfer, the membrane was blocked in 5% non-fat milk powder (for VPS35&VPS26) and 3%  
469 BSA (for GFP) and incubated with primary antibody diluted in 5% non-fat milk powder (for mouse  
470 anti-VPS35 & mouse anti-VPS26 1:1500 dilution) or 1%BSA (for rabbit anti-GFP 1:10000  
471 dilution) overnight at 4°C. Following incubation, the membrane was briefly washed three times  
472 with TBS-T and incubated with HRP-conjugated secondary antibodies (anti-mouse HRP 1:5000  
473 dilution and anti-rabbit HRP 1:15000 dilution) diluted in 5% non-fat milk powder or 1%BSA for  
474 1.5hr at RT. The membrane was washed three times for 5 min in TBS-T flowed by two times  
475 washing with TBS at RT and incubated for 5min at RT with Enhanced Chemiluminescence (ECL)  
476 substrate and ECL plus (1:1).

## 477 **Immunoblotting**

478 HepG2 cells were grown on 60mm dish and cell pellet was collected at 70% confluency. For  
479 lysate preparation of membrane protein dry pellet was dissolved in 200µL of lysis buffer  
480 (composition: sucrose 250mM, EDTA 1mM, EGTA 1mM, 1X PBS as solvent, 1X protease  
481 cocktail inhibitor) and incubated on ice for 1hour with intermittent tapping. Dounce

482 homogenization of dissolved pellet was done for approx. 400 times followed by syringe up down  
483 with 22-24 gauge needle for 20-25 times on ice. This enables the cell to rupture completely. The  
484 soup was centrifuged at 600 R.C.F at 4<sup>0</sup>C for 10mins to discard debris and nucleus. Further  
485 mitochondrial fraction was discarded by centrifugation at 3000 R.C.F for 10mins at 4<sup>0</sup>C. The  
486 resultant soup was subjected for ultra-centrifugation at 1,00,000 R.C.F for 1hour at 4<sup>0</sup>C to collect  
487 membrane fraction. Pellet was dissolved in membrane solubilizing buffer (composition: sucrose  
488 250mM, EDTA 1mM, EGTA 1mM, NP-40 1.0%, Triton X-100 1.0%, 1X PBS as solvent, 1X  
489 protease cocktail inhibitor). For, soluble protein, whole cell lysate was prepared with RIPA lysis  
490 buffer (composition: 10mM Tris-Cl pH 8.0, 1mM EDTA, 0.5mM EGTA, 1.0% Triton X-100, 0.1%  
491 sodium deoxycholate, 0.1% sodium dodecyl sulphate, 140mM NaCl, 1X protease cocktail  
492 inhibitor). Dry pellet was dissolved in RIPA lysis buffer and incubated on ice for 30mins with  
493 intermittent tapping. The solution is then sonicated with a probe sonicator (3-4 pulses, 5sec,  
494 100mA). Followed by this, centrifugation at 20,000 R.P.M for 20mins at 40C was done to pellet  
495 down cellular insoluble debris and soup was collected. Protein estimation was carried out with  
496 Bradford reagent (B6916-500ML) following manufacturer's protocol. Protein sample preparation  
497 was done by adding 4X loading buffer (composition: Tris-Cl pH 6.81, 4% SDS, 10% β-ME, 20%  
498 glycerol, 0.02% bromophenol blue, urea 8M) to a final concentration of 1X and ran on SDS  
499 PAGE (6% for membrane fraction and 10-12% for soluble fraction) to separate proteins  
500 according to molecular mass. This was further followed by wet transfer of proteins onto  
501 nitrocellulose membrane (1620112, BioRad). After transfer, the membrane was blocked with 3%  
502 BSA in 1X Tris-buffered saline (TBS) buffer pH7.5 for 2hrs at RT with mild shaking. Primary  
503 antibody incubation was done overnight at 4<sup>0</sup> C following blocking and then washed with 1X  
504 TBST (0.01% Tween-20) for 10mins (× 3 times). HRP conjugated respective secondary

505 incubation was done for 1.3 hrs at RT, further washed and signal was developed by ECL  
506 developer (170-5060, BioRad/ 1705062, BioRad) in chemiluminescence by Chemi Doc (BioRad)

## 507 **Microscopy**

508 All images were acquired with Leica SP8 confocal platform using oil immersion 63X objective  
509 and deconvoluted using Leica Lightning software. For Structured Illumination Microscopy,  
510 images acquisition was taken at 100X magnification in Zeiss Elyra PSI. For Stimulated emission  
511 depletion (STED) microscopy, imaging was done in Leica STED 3X. For Alexa 647, 775 STED  
512 laser line was used and for Alexa 488, 592 laser line was used for depletion. Line average was  
513 set at 4 and pixel size was kept as 25nm to achieve maximum resolution. STED corrected  
514 images were deconvoluted and processed by Scientific Volume Imaging of Huygens  
515 Professional Software with default settings.

## 516 **Image analysis and statistics**

517 Images were analyzed in batches using ImageJ (Schneider et al., 2012), image analysis  
518 software. For colocalization study, Colocalization\_Finder plugin was used. RO Is were drawn  
519 manually on best z-stack for each cell. For three protein colocalization study, the other two  
520 protein co-residing vesicles were isolated using Analyze Particle tool, and colocalization study  
521 were carried on with the reference protein, ATP7B in our case. RGB\_Profiler plugin was used to  
522 obtain the line profile graph. For statistical analysis and plotting, ggplot2 (Wickham 2009)  
523 package was used in R v-3.4.0 (Team 2015). Non-parametric tests for unpaired datasets  
524 (Kruskal Wallis test and Mann-Whitney U test) were performed for all the samples.

525



526 **Fig 1: ATP7B & Golgin97 spatiotemporal**

|                           | <b>BCS<br/>2hrs</b> | <b>Cu<br/>2hrs</b> | <b>Cu&gt;BCS<br/>10'</b> | <b>Cu&gt;BCS<br/>30'</b> |
|---------------------------|---------------------|--------------------|--------------------------|--------------------------|
| <b>Cu&gt;BCS<br/>2hrs</b> | **                  | ****               | ****                     | ****                     |
| <b>Cu&gt;BCS<br/>30'</b>  | ****                | ****               | ****                     |                          |
| <b>Cu&gt;BCS<br/>10'</b>  | ****                | ns                 |                          |                          |
| <b>Cu 2hrs</b>            | ****                |                    |                          |                          |

534 Data set was collected from BCS 2hrs (32 cells), Cu 2hrs (89 cells), Cu>BCS 10' (46 cells),  
535 Cu>BCS 30' (82cells), Cu>BCS 2hrs (195)

536

537 **Fig 2: ATP7B & Lamp1 spatiotemporal**

|                    | <b>BCS</b> | <b>Cu</b> |
|--------------------|------------|-----------|
| <b>Cu&gt;BCS30</b> | ****       | ****      |
| <b>Cu</b>          | ****       |           |

543 The dataset was collected from 215 cells for BCS treatment, 150 cells for Copper treatment,  
544 196 cells for Cu>BCS 30'

545 **Fig3: ATP7B & VPS35 spatiotemporal**

|                    | <b>BCS</b> | <b>Cu</b> | <b>BCS10'</b> |
|--------------------|------------|-----------|---------------|
| <b>Cu&gt;BCS30</b> | *          | ns        | ns            |
| <b>Cu&gt;BCS10</b> | **         | ns        |               |
| <b>Cu</b>          | **         |           |               |

552 The dataset was collected from 66 cells for BCS treatment, 69 cells for Copper treatment, 54  
553 cells for Cu>BCS10' and 80 cells for Cu>BCS 30'

554 **Fig4: ATP7B & Golgin97 (siVPS35)**

555

|                           | <b>BCS<br/>ctrl</b> | <b>Cu<br/>ctrl</b> | <b>Cu&gt;BCS<br/>ctrl</b> | <b>BCS<br/>si</b> | <b>Cu si</b> |
|---------------------------|---------------------|--------------------|---------------------------|-------------------|--------------|
| <b>Cu&gt;BCS<br/>si</b>   | ****                | ns                 | ****                      | ****              | ns           |
| <b>Cu si</b>              | ****                | ns                 | ****                      | ****              |              |
| <b>BCS si</b>             | ns                  | ****               | ns                        |                   |              |
| <b>Cu&gt;BCS<br/>ctrl</b> | ****                | ****               |                           |                   |              |
| <b>Cu ctrl</b>            | ****                |                    |                           |                   |              |

564 Data set was collected from BCS ctrl (22 cells), Cu ctrl (21 cells), Cu>BCS ctrl (19 cells), si  
565 BCS (15 cells), si Cu (15 cells), si Cu>BCS (20 cells)

566

567 \* P<0.05, \*\* p<0.01, \*\*\* p<0.001, \*\*\*\* p<0.0001, ns- non significant

568

569 **Online Supplementary materials**

570 Video: Time lapse imaging to record colocalization of ATP7B (green) and VPS35 (red) in high  
571 copper. 1A: ATP7B and wt-VPS35; 1B: ATP7B and R107A-VPS35

572

## 573 Bibliography

574

575 Abdelghaffar, T.Y., S.M. Elsayed, E. Elsobky, B. Bochow, J. Buttner, and H. Schmidt. 2008. Mutational analysis of  
576 ATP7B gene in Egyptian children with Wilson disease: 12 novel mutations. *J Hum Genet.* 53:681-687.

577 Abu-Remaileh, M., G.A. Wyant, C. Kim, N.N. Laqtom, M. Abbasi, S.H. Chan, E. Freinkman, and D.M. Sabatini. 2017.  
578 Lysosomal metabolomics reveals V-ATPase- and mTOR-dependent regulation of amino acid efflux from  
579 lysosomes. *Science.* 358:807-813.

580 Aggarwal, A., G. Chandhok, T. Todorov, S. Parekh, S. Tilve, A. Zibert, M. Bhatt, and H.H. Schmidt. 2013. Wilson  
581 disease mutation pattern with genotype-phenotype correlations from Western India: confirmation of  
582 p.C271\* as a common Indian mutation and identification of 14 novel mutations. *Ann Hum Genet.* 77:299-  
583 307.

584 Ala, A., E. Aliu, and M.L. Schilsky. 2015. Prospective pilot study of a single daily dosage of trientine for the  
585 treatment of Wilson disease. *Dig Dis Sci.* 60:1433-1439.

586 Ala, A., J. Borjigin, A. Rochwarger, and M. Schilsky. 2005. Wilson disease in septuagenarian siblings: Raising the  
587 bar for diagnosis. *Hepatology.* 41:668-670.

588 Arighi, C.N., L.M. Hartnell, R.C. Aguilar, C.R. Haft, and J.S. Bonifacino. 2004. Role of the mammalian retromer in  
589 sorting of the cation-independent mannose 6-phosphate receptor. *J Cell Biol.* 165:123-133.

590 Barry, A.N., A. Otoikhian, S. Bhatt, U. Shinde, R. Tsivkovskii, N.J. Blackburn, and S. Lutsenko. 2011. The luminal  
591 loop Met672-Pro707 of copper-transporting ATPase ATP7A binds metals and facilitates copper release  
592 from the intramembrane sites. *The Journal of biological chemistry.* 286:26585-26594.

593 Belenkaya, T., Y. Wu, X. Tang, B. Zhou, L. Cheng, Y. Sharma, D. Yan, E. Selva, and X. Lin. 2008. The Retromer  
594 Complex Influences Wnt Secretion by Recycling Wntless from Endosomes to the Trans-Golgi Network. *Dev*  
595 *Cell.* 14:120-131.

596 Binda, C.S., Y. Nakamura, J.M. Henley, and K.A. Wilkinson. 2019. Sorting nexin 27 rescues neuroigin 2 from  
597 lysosomal degradation to control inhibitory synapse number. *Biochem J.* 476:293-306.

598 Blaby-Haas, C.E., and S.S. Merchant. 2014. Lysosome-related Organelles as Mediators of Metal Homeostasis. *J.*  
599 *Biol. Chem.* 289:28129–28136.

600 Braiterman, L., L. Nyasae, Y. Guo, R. Bustos, S. Lutsenko, and A. Hubbard. 2009. Apical targeting and Golgi retention  
601 signals reside within a 9-amino acid sequence in the copper-ATPase, ATP7B. *Am J Physiol Gastrointest*  
602 *Liver Physiol.* 296:G433-444.

603 Braiterman, L., L. Nyasae, F. Leves, and A.L. Hubbard. 2011. Critical roles for the COOH terminus of the Cu-ATPase  
604 ATP7B in protein stability, trans-Golgi network retention, copper sensing, and retrograde trafficking. *Am*  
605 *J Physiol Gastrointest Liver Physiol.* 301:G69-81.

606 Braiterman, L.T., A. Gupta, R. Chaerkady, R.N. Cole, and A.L. Hubbard. 2015. Communication between the N and  
607 C Termini Is Required for Copper-stimulated Ser/Thr Phosphorylation of Cu(I)-ATPase (ATP7B). *The Journal*  
608 *of biological chemistry.* 290:8803-8819.

609 Braiterman, L.T., A. Murthy, S. Jayakanthan, L. Nyasae, E. Tzeng, G. Gromadzka, T.B. Woolf, S. Lutsenko, and A.L.  
610 Hubbard. 2014. Distinct phenotype of a Wilson disease mutation reveals a novel trafficking determinant  
611 in the copper transporter ATP7B. *Proc Natl Acad Sci U S A.* 111:E1364-1373.

612 Burd, C., and P.J. Cullen. 2014. Retromer: a master conductor of endosome sorting. *Cold Spring Harbor*  
613 *perspectives in biology.* 6.

614 Caca, K., P. Ferenci, H.J. Kuhn, C. Polli, H. Willgerodt, B. Kunath, W. Hermann, J. Mossner, and F. Berr. 2001. High  
615 prevalence of the H1069Q mutation in East German patients with Wilson disease: rapid detection of  
616 mutations by limited sequencing and phenotype-genotype analysis. *J Hepatol.* 35:575-581.

617 Canuel, L. S, Z. J, and M. CR. 2008. AP-1 and retromer play opposite roles in the trafficking of sortilin between the  
618 Golgi apparatus and the lysosomes. *Biochem Biophys Res Commun.* 366:724-730.

- 619 Chen, X., J. Kordich, E. Williams, N. Levine, A. Cole-Strauss, L. Marshall, V. Labrie, J. Ma, J. Lipton, and D. Moore.  
620 2019. Parkinson's disease-linked D620N VPS35 knockin mice manifest tau neuropathology and  
621 dopaminergic neurodegeneration. *Proc Natl Acad Sci U S A* .
- 622 Chen, Y., Y. Chang, M. Lan, P. Chen, and C. Lin. 2017. Identification of VPS35 p.D620N mutation-related Parkinson's  
623 disease in a Taiwanese family with successful bilateral subthalamic nucleus deep brain stimulation: a case  
624 report and literature review. *BMC Neurol*. 17:191.
- 625 Cheng, X., Y. Xie, B. Zhou, N. Huang, T. Farfel-Becker, and Z. Sheng. 2018. Characterization of LAMP1-labeled  
626 nondegradative lysosomal and endocytic compartments in neurons.  
627 *J Cell Biol*. 217:3127-3139.
- 628 Cui, Y., J. Carosi, Z. Yang, N. Ariotti, M. Kerr, R. Parton, T. Sargeant, and R. Teasdale. 2019. Retromer has a selective  
629 function in cargo sorting via endosome transport carriers. *J Cell Biol*. 218:615-631.
- 630 Cullen, P.J., and H.C. Korswagen. 2012. Sorting nexins provide diversity for retromer-dependent trafficking events.  
631 *Nat Cell Biol*. 14:29-37.
- 632 Fahrni. 2013. Synthetic fluorescent probes for monovalent copper. *Curr Opin Chem Biol*. 17:656-662.
- 633 Feinstein, T., V. Wehbi, J. Ardura, D. Wheeler, S. Ferrandon, T. Gardella, and J. Vilardaga. 2011. Retromer  
634 terminates the generation of cAMP by internalized PTH receptors. *Nat Chem Biol*. 7:278-284.
- 635 Follett, J., A. Bugarcic, Z. Yang, N. Ariotti, S. Norwood, B. Collins, R. Parton, and R. Teasdale. 2016. Parkinson's  
636 disease linked Vps35 R524W mutation impairs the endosomal association of retromer and induces  $\alpha$ -  
637 synuclein aggregation. *J Biol Chem*. 291:18283-18298.
- 638 Francis, M., E. Jones, E. Levy, R. Martin, S. Ponnambalam, and A. Monaco. 1999. Identification of a di-leucine motif  
639 within the C terminus domain of the Menkes disease protein that mediates endocytosis from the plasma  
640 membrane. *J Cell Sci*. 112:1721-1732.
- 641 Fuse, A., N. Furuya, S. Kakuta, A. Inose, M. Sato, M. Koike, S. Saiki, and N. Hattori. 2015. VPS29–VPS35 intermediate  
642 of retromer is stable and may be involved in the retromer complex assembly process. *FEBS Lett*. .  
643 589:1430-1436.
- 644 Gershlick, D.C., and M. Lucas. 2017. Endosomal Trafficking: Retromer and Retriever Are Relatives in Recycling.  
645 *Current biology : CB*. 27:R1233-R1236.
- 646 Gokool, S., D. Tattersall, J. Reddy, and M. Seaman. 2007. Identification of a conserved motif required for  
647 Vps35p/Vps26p interaction and assembly of the retromer complex. *Biochem. J*. 408:287-295.
- 648 Gupta, A., D. Aikath, R. Neogi, S. Datta, K. Basu, B. Maity, R. Trivedi, J. Ray, S.K. Das, P.K. Gangopadhyay, and K.  
649 Ray. 2005. Molecular pathogenesis of Wilson disease: haplotype analysis, detection of prevalent  
650 mutations and genotype-phenotype correlation in Indian patients. *Hum Genet*. 118:49-57.
- 651 Gupta, A., A. Bhattacharjee, O.Y. Dmitriev, S. Nokhrin, L. Braiterman, A.L. Hubbard, and S. Lutsenko. 2011. Cellular  
652 copper levels determine the phenotype of the Arg875 variant of ATP7B/Wilson disease protein.  
653 *Proceedings of the National Academy of Sciences of the United States of America*. 108:5390-5395.
- 654 Gupta, A., S. Das, and K. Ray. 2018. A glimpse into the regulation of the Wilson disease protein, ATP7B, sheds light  
655 on the complexity of mammalian apical trafficking pathways. *Metallomics*. 10:378-387.
- 656 Gupta, A., and S. Lutsenko. 2009. Human copper transporters: mechanism, role in human diseases and therapeutic  
657 potential. *Future Med Chem*. 1:1125-1142.
- 658 Gupta, A., M.J. Schell, A. Bhattacharjee, S. Lutsenko, and A.L. Hubbard. 2016. Myosin Vb mediates copper export  
659 in polarized hepatocytes. *J Cell Sci*.
- 660 Harada, M., S. Sakisaka, T. Kawaguchi, R. Kimura, E. Taniguchi, H. Koga, S. Hanada, S. Baba, K. Furuta, R. Kumashiro,  
661 T. Sugiyama, and M. Sata. 2000. Copper does not alter the intracellular distribution of ATP7B, a copper-  
662 transporting ATPase. *Biochem Biophys Res Commun*. 275:871-876.
- 663 Hierro, A., A. Rojas, R. Rojas, N. Murthy, G. Effantin, A. Kajava, A. Steven, J. Bonifacino, and J. Hurley. 2007.  
664 Functional architecture of the retromer cargo-recognition complex. *Nature*. 449:1063-1067.

- 665 Humphries, W.t., C. Szymanski, and C. Payne. 2011. Endo-Lysosomal Vesicles Positive for Rab7 and LAMP1 Are  
666 Terminal Vesicles for the Transport of Dextran. *PlosOne*. 6.
- 667 Huster, D., and S. Lutsenko. 2007. Wilson disease: not just a copper disorder. Analysis of a Wilson disease model  
668 demonstrates the link between copper and lipid metabolism. *Mol Biosyst*. 3:816-824.
- 669 Jain, S., G.G. Farias, and J.S. Bonifacino. 2014. Polarized Sorting of the Copper Transporter ATP7B in Neurons  
670 Mediated by Recognition of a Dileucine Signal by AP-1. *Mol Biol Cell*.
- 671 Kambe. 2011. An overview of a wide range of functions of ZnT and Zip zinc transporters in the secretory pathway.  
672 *Biosci Biotechnol Biochem*. 75:1036-1043.
- 673 Korolchuk, V.I., and D.C. Rubinsztein. 2011. Regulation of autophagy by lysosomal positioning. *Autophagy*. 7:927-  
674 928.
- 675 Kurz, T., E. JW, and B. UT. 2011. The role of lysosomes in iron metabolism and recycling. *Int J Biochem Cell Biol*.  
676 43(12):1686-1697.
- 677 LeShane, E.S., U. Shinde, J.M. Walker, A.N. Barry, N.J. Blackburn, M. Ralle, and S. Lutsenko. 2010. Interactions  
678 between copper-binding sites determine the redox status and conformation of the regulatory N-terminal  
679 domain of ATP7B. *The Journal of biological chemistry*. 285:6327-6336.
- 680 Lucas, M., D. Gershlick, A. Vidaurrazaga, A. Rojas, J. Bonifacino, and A. Hierro. 2016. Structural Mechanism for  
681 Cargo Recognition by the Retromer Complex. *Cell* 167:1623-1635.
- 682 Lucas, M., and A. Hierro. 2017. Retromer. *Current biology : CB*. 27:R687-R689.
- 683 Lutsenko, S. 2016. Copper trafficking to the secretory pathway. *Metallomics*. 8:840-852.
- 684 Materia, S., M.A. Cater, L.W. Klomp, J.F. Mercer, and S. La Fontaine. 2012. Clusterin and COMMD1 independently  
685 regulate degradation of the mammalian copper ATPases ATP7A and ATP7B. *The Journal of biological  
686 chemistry*. 287:2485-2499.
- 687 McGough, I., F. Steinberg, M. Gallon, A. Yatsu, N. Ohbayashi, K. Heesom, M. Fukuda, and P. Cullen. 2014.  
688 Identification of molecular heterogeneity in SNX27-retromer-mediated endosome-to-plasma-membrane  
689 recycling. *J Cell Sci*. 127:4940-4953.
- 690 Mellado, M., Y. Cuartero, R. Brugada, and M. Verges. 2014. Subcellular localisation of retromer in post-endocytic  
691 pathways of polarised Madin-Darby canine kidney cells. *Biol Cell*. 106:377-393.
- 692 Muchenditsi, A., H. Yang, J. Hamilton, L. Koganti, F. Housseau, L. Aronov, H. Fan, H. Pierson, A. Bhattacharjee, R.  
693 Murphy, C. Sears, J. Potter, C. Wooton-Kee, and S. Lutsenko. 2017. Targeted inactivation of copper  
694 transporter Atp7b in hepatocytes causes liver steatosis and obesity in mice. *Am J Physiol Gastrointest Liver  
695 Physiol*. 313:G39-G49.
- 696 Otoikhian, A., A.N. Barry, M. Mayfield, M. Nilges, Y. Huang, S. Lutsenko, and N.J. Blackburn. 2012. Luminal loop  
697 M672-P707 of the Menkes protein (ATP7A) transfers copper to peptidylglycine monooxygenase. *Journal  
698 of the American Chemical Society*. 134:10458-10468.
- 699 Petris, M.J., J. Camakaris, M. Greenough, S. LaFontaine, and J.F. Mercer. 1998. A C-terminal di-leucine is required  
700 for localization of the Menkes protein in the trans-Golgi network. *Human molecular genetics*. 7:2063-  
701 2071.
- 702 Polishchuk, E.V., M. Concilli, S. Iacobacci, G. Chesì, N. Pastore, P. Piccolo, S. Paladino, D. Baldantoni, I.S.C. van, J.  
703 Chan, C.J. Chang, A. Amoresano, F. Pane, P. Pucci, A. Tarallo, G. Parenti, N. Brunetti-Pierri, C. Settembre,  
704 A. Ballabio, and R.S. Polishchuk. 2014. Wilson disease protein ATP7B utilizes lysosomal exocytosis to  
705 maintain copper homeostasis. *Dev Cell*. 29:686-700.
- 706 Priya, A., I. Kalaidzidis, Y. Kalaidzidis, D. Lambright, and S. Datta. 2015. Molecular insights into Rab7-mediated  
707 endosomal recruitment of core retromer: deciphering the role of Vps26 and Vps35. *Traffic*. 16:68-84.
- 708 Rabanal-Ruiz, Y., and V.I. Korolchuk. 2018. mTORC1 and Nutrient Homeostasis: The Central Role of the Lysosome.  
709 *International journal of molecular sciences*. 19.
- 710 Rahman, A., and B. Morrison. 2019. Contributions of VPS35 Mutations to Parkinson's Disease. *Neuroscience*.  
711 401:1-10.
- 712 Reitz, C. 2018. Retromer Dysfunction and Neurodegenerative Disease. *Curr Genomics*. 19:279-288.

- 713 Rojas, R., T. van Vlijmen, G. Mardones, Y. Prabhu, A. Rojas, S. Mohammed, A. Heck, G. Raposo, P. van der Sluijs,  
714 and J. Bonifacino. 2008. Regulation of retromer recruitment to endosomes by sequential action of Rab5  
715 and Rab7. *J Cell Biol.* 183:513-526.
- 716 Schneider, C., W. Rasband, and K. Eliceiri. 2012. NIH Image to ImageJ: 25 years of image analysis. . *Nat Methods.*  
717 volume9:671–675.
- 718 Seaman, M. 2007. Identification of a novel conserved sorting motif required for retromer-mediated endosome-  
719 to-TGN retrieval. *J Cell Sci.* 120:2378-2389.
- 720 Seaman, M.N.J. 2018. Retromer and Its Role in Regulating Signaling at Endosomes. *Progress in molecular and*  
721 *subcellular biology.* 57:137-149.
- 722 Shannon, B., A. Soto-Ortolaza, S. Rayaprolu, H. Cannon, C. Labbé, B. Benitez, J. Choi, T. Lynch, M. Boczarska-  
723 Jedynak, G. Opala, A. Krygowska-Wajs, M. Barcikowska, J. Van Gerpen, R. Uitti, W. Springer, C. Cruchaga,  
724 Z. Wszolek, and O. Ross. 2014. Genetic variation of the retromer subunits VPS26A/B-VPS29 in Parkinson's  
725 disease. *Neurobiol Aging.* . 35:1958.e1951-1952.
- 726 Small, S. 2008. Retromer Sorting: A Pathogenic Pathway in Late-Onset Alzheimer Diseases. *Arch Neurol.* 65:323-328.
- 727 Steinberg, F., M. Gallon, M. Winfield, E. Thomas, A. Bell, K. Heesom, J. Tavaré, and P. Cullen. 2013. A global analysis  
728 of SNX27–retromer assembly and cargo specificity reveals a function in glucose and metal ion transport.  
729 *Nat Cell Biol.* 15:461-471.
- 730 Suzuki, S., Y. Chuang, M. Li, M. Seaman, and S. Emr. 2019. A bipartite sorting signal ensures specificity of retromer  
731 complex in membrane protein recycling. *J Cell Biol.*
- 732 Suzuki, S., and S. Emr. 2018a. Membrane protein recycling from the vacuole/lysosome membrane. *J. Cell Biol.*  
733 217:1623-1632.
- 734 Suzuki, S., and S. Emr. 2018b. Retrograde trafficking from the vacuole/lysosome membrane. *Autophagy.* 14:1654-  
735 1655.
- 736 Tabuchi, M., I. Yanatori, Y. Kawai, and F. Kishi. 2009. Retromer-mediated direct sorting is required for proper  
737 endosomal recycling of the mammalian iron transporter DMT1. *J Cell Sci.* 123:756-766.
- 738 Tammineni, P., Y.Y. Jeong, T. Feng, D. Aikal, and Q. Cai. 2017. Impaired axonal retrograde trafficking of the  
739 retromer complex augments lysosomal deficits in Alzheimer's disease neurons. *Human molecular*  
740 *genetics.* 26:4352-4366.
- 741 Team, R.D.C. 2015. R: A language and environment for statistical computing. .
- 742 Telianidis, J., Y.H. Hung, S. Materia, and S.L. Fontaine. 2013. Role of the P-Type ATPases, ATP7A and ATP7B in brain  
743 copper homeostasis. *Frontiers in Aging Neuroscience.* 5.
- 744 Uauy, R., M. Olivares, and M. Gonzalez. 1998. Essentiality of copper in humans. *Am J Clin Nutr.* 67:952S-959S.
- 745 Vardarajan, B., S. Bruesegem, M. Harbour, R. Inzelberg, R. Friedland, P. St George-Hyslop, M. Seaman, and L.  
746 Farrer. 2012. Identification of Alzheimer disease-associated variants in genes that regulate retromer  
747 function. *Neurobiol Aging.* 33:2231.e2215-2231.e2230.
- 748 Wen, L., F. Tang, Y. Hong, S. Luo, C. Wang, W. He, C. Shen, J. Jung, F. Xiong, D. Lee, Q. Zhang, D. Brann, T. Kim, R.  
749 Yan, L. Mei, and W. Xiong. 2011. VPS35 haploinsufficiency increases Alzheimer's disease neuropathology.  
750 *J Cell Biol.* . 195:765-779.
- 751 Wickham. 2009. Ggplot2 : elegant graphics for data analysis. *Springer.*
- 752 Zhang, J., C. Reiling, J. Reinecke, I. Prislán, L. Marky, P. Sorgen, N. Naslavsky, and S. Caplan. 2012. Rabankyrin-5  
753 interacts with EHD1 and Vps26 to regulate endocytic trafficking and retromer function. *Traffic.* 13:745-  
754 757.
- 755 Zhao, X., S. Nothwehr, R. Lara-Lemus, B. Zhang, H. Peter, and P. Arvan. 2007 Dominant-negative behavior of  
756 mammalian Vps35 in yeast requires a conserved PRLYL motif involved in retromer assembly. *Traffic.*  
757 8:1829-1840.

758

759



## 760 **LEGENDS TO FIGURES**

761 **Fig1: ATP7B recycles between TGN and vesicles in a copper dependent manner:** (A)  
762 Colocalization of ATP7B (green) with TGN marker, Golgin97 (red) in copper limiting, BCS (top  
763 panel) and 50 $\mu$ M copper (panel 2). Panel 3-5 shows subsequent return of vesicularized ATP7B  
764 upon BCS treatment for varying time length (10, 30 and 120mins). The overlap plots (right boxes)  
765 show the extent of overlap of green and red at lines drawn through the signals located on TGN  
766 (marked by arrow). Arrow and Arrowhead represents TGN localized and vesicularized ATP7B  
767 respectively. Scale bars represents 5 $\mu$ M. Blue signal represents DAPI staining for nucleus. (B)  
768 Pearson's correlation coefficient of colocalization between ATP7B and Golgin97 at different  
769 copper conditions demonstrated by a box plot with jitter points

770 **Fig2: ATP7B recycles from lysosome upon copper depletion:** (A) Colocalization of ATP7B  
771 (green) with lysosomal marker, lamp1 (red) in copper limiting, BCS (top panel) and 50 $\mu$ M copper  
772 (panel 2) and copper depletion post copper treatment (bottom panel). The overlap plots (right  
773 boxes) show the extent of overlap of green and red at lines drawn through the signals (marked  
774 by arrow or arrowhead). Arrowhead represents vesicularized ATP7B and arrow represents  
775 perinuclear positioned ATP7B. Scale bars represents 5 $\mu$ M. Blue signal represents DAPI staining  
776 for nucleus. (B) Pearson's correlation coefficient of colocalization between ATP7B and Lamp1  
777 at different copper conditions demonstrated by a box plot with jitter points. (C) and (D)  
778 Comparative protein abundance of ATP7B (normalized against total membrane protein)  
779 determined by immunoblot at different copper and copper-depleted conditions (Cu: 50  $\mu$ M and  
780 250  $\mu$ M and BCS: 50  $\mu$ M).

781 **Fig3: ATP7B is preferentially located in Rab7-Lamp1 positive endosomes in high copper:**  
782 (A) Colocalization of ATP7B (cyan) with lysosomal marker, lamp1 (green) and late endosome  
783 marker, mCherry Rab7 (red) at 50 $\mu$ M copper. (B) 3D representation of Structured Illumination  
784 Microscopy (SIM) image of same with 100nm resolution. ATP7B is marked in magenta, Lamp1  
785 in green and mCherry Rab7 in red. Arrow represents triple merging. Blue signal represents DAPI  
786 staining for nucleus.

787 **Fig4: ATP7B and VPS35 colocalizes at high copper:** (A) Immunoblot showing HepG2  
788 expresses the retromer subunits VPS26 and VPS35 (B) Colocalization of ATP7B (green) with  
789 retromer subunit, VPS35 (red) in copper limiting, BCS (top panel) and 50 $\mu$ M copper (panel 2)  
790 and copper depletion post copper treatment (panels 3-4). The overlap plots (right boxes) show  
791 the extent of overlap of green and red at lines drawn through the signals (marked by arrow or  
792 arrowhead). Arrowhead represents vesicularized ATP7B and arrow represents perinuclear  
793 ATP7B. Scale bars represent 5 $\mu$ M. Blue signal represents DAPI staining for nucleus. (C)  
794 Pearson's correlation coefficient of colocalization between ATP7B and VPS35 at different copper  
795 conditions demonstrated by a box plot with jitter points

796 **Fig5: VPS35 regulates retrieval of ATP7B from lysosomes to TGN:** (A) siRNA mediated  
797 knockdown of Vps35 in HepG2 cells shows its downregulation. (\*) denotes the VPS35 protein  
798 (B) Colocalization of ATP7B (green) with TGN marker, Golgin97 (red) in BCS (top panel) and  
799 50 $\mu$ M copper (panel 2) and copper depletion post copper treatment (panels 3). Arrow denotes

800 TGN colocalization of ATP7B, Arrowhead denotes vesicularized ATP7B. Scale bars represent  
801 5 $\mu$ M. (C) Pearson's correlation coefficient of colocalization between ATP7B and TGN at different  
802 copper conditions comparing VPS35 siRNA treated vs control demonstrated by a box plot. (D)  
803 Merged image showing colocalization of ATP7B (green) with Lamp1 (red) in high copper  
804 (top/bottom left) and copper depletion post copper treatment for 30 mins and 2h (top/bottom  
805 middle and right respectively). The top panel represents control cells transfected with scrambled  
806 siRNA and bottom panel represents cells with VPS35 siRNA. Arrows mark perinuclear ATP7B  
807 and arrowheads denote vesicular ATP7B (E) Localization of ATP7B (green) in VPS35 siRNA  
808 treated cells and subsequently transfected with mCherry-wtVPS35 (red). The left image  
809 represents cells that is not expressing mCherry-wtVPS35 (arrow represents vesicularized  
810 ATP7B) as compared to cells expressing the construct (arrowhead represents presence of tight  
811 perinuclear ATP7B). Cells belong to the same culture dish for both the images. Blue signal  
812 represents DAPI staining for nucleus.

813 **Fig6: Lysosomal luminal pH does not influence localization of ATP7B and recruitment of**  
814 **VPS35:** (A) Colocalization of ATP7B (green), Lamp1 (red) and VPS35 (cyan) in high copper for  
815 2hrs in cells treated with Bafilomycin 1 (lower panel) or not (upper panel). (B) Colocalization of  
816 ATP7B (green), Lamp1 (red) and VPS35 (cyan) in cells treated with copper chelator for a brief  
817 period (20 mins) subsequent to high copper treatment to induce ATP7B vesicularization. Cells  
818 were treated with Bafilomycin 1 (lower panel) or not (upper panel).

819 **Fig7: ATP7B N-terminal <sup>41</sup>NVGY<sup>44</sup>  $\Delta$  mutant exhibits non-recycling phenotype:** Panel A:  
820 Colocalization of GFP-wtATP7B (green) with TGN marker, Golgin97 (red) shows ATP7B located  
821 on TGN in copper limiting, 50 $\mu$ M BCS (a), vesicularizes at 50 $\mu$ M copper (b) and subsequent  
822 return to TGN upon copper depletion post copper treatment (c). Panel B: The deletion mutant,  
823 <sup>41</sup>NVGY<sup>44</sup>  $\Delta$  GFP-ATP7B (green) shows localization with Golgin97 (red) in 50 $\mu$ M BCS (d),  
824 vesicularized at 50 $\mu$ M copper (e), primarily vesicularized ATP7B at Cu>BCS (f). Panel C:  
825 Colocalization of <sup>41</sup>NVGY<sup>44</sup>  $\Delta$  GFP-ATP7B (green), Lamp1 (red) and VPS35 (cyan). The  
826 construct remain perinuclear at 50 $\mu$ M BCS (g), colocalization of vesicularized ATP7B construct  
827 with Lamp1 and VPS35 at 50 $\mu$ M copper (h), remain vesicularized with similar colocalization of  
828 the ATP7B construct with Lamp1 and VPS35 as in 'h' (i). Blue signal represents DAPI staining  
829 for nucleus. Arrow denotes perinuclear ATP7B and arrowheads denote vesicularized ATP7B.  
830 Scale bars represent 5 $\mu$ M.

831 **Fig8: VPS35 interacts with ATP7B on lysosome in a micro-distant manner:** (A) High  
832 resolution deconvoluted confocal microscopy merged image showing colocalization of ATP7B  
833 (green) with Lamp1 (red) and VPS35 (blue) at 50 $\mu$ M copper. Grey represents nucleus. (B)  
834 Zoomed image of inset in A. The overlap plots (right box) show the extent of overlap of green,  
835 red and blue at lines drawn through the signals (marked by white line). (C) 3D representation of  
836 zoomed image in B, marked by dashed line. ATP7B is marked in green, Lamp1 in grey, VPS35  
837 in magenta. Cyan represents nucleus. (D) 3D representation of Structured Illumination  
838 Microscopy (SIM) image of same with 100nm resolution. ATP7B is marked in green, Lamp1 in  
839 red and VPS35 in magenta. Arrowhead represents co-distribution of ATP7B and VPS35 in  
840 lysosomal compartment (Lamp1). (E) Stimulated emission depletion (STED) microscopy image



841 of ATP7B (green) and VPS35 (red). Top panel and bottom panel shows colocalization of ATP7B  
842 and VPS35 in high copper and copper depletion post copper treatment respectively. In both  
843 conditions ATP7B containing vesicles (marked by dotted circle) show juxta-positioning of VPS35  
844 (red) and ATP7B (green). Arrowhead represents point of juxtaposition or merging. Scale bars  
845 represents 200nM.

846 **Fig9: Schematic representation of recycling of ATP7B between TGN and lysosomes.**  
847 Retromers are recruited on the lysosomal membrane that regulates retrograde transport of  
848 ATP7B upon copper removal.

849  
850

### 851 Legends to supplementary figures

852 **Fig S1: Colocalization of ATP7B with late (Rab7) and mid (Rab11) endosomal markers at**  
853 **different copper levels:** (A) Colocalization of ATP7B (green) with late endosome marker, Rab7  
854 (red) in copper limiting, BCS (top panel) and 50uM copper (panel 2) and copper depletion post  
855 copper treatment (bottom panel). Scale bars represents 5µM. Blue signal represents DAPI  
856 staining for nucleus. (B) Pearson's correlation coefficient of colocalization between ATP7B and  
857 Rab7 at different copper conditions demonstrated by a box plot. (C) Colocalization of ATP7B  
858 (green) with mid endosome marker, Rab11 (red) in copper limiting, BCS (top panel) and 50uM  
859 copper (panel 2) and copper depletion post copper treatment (bottom panel).

860 **Fig S2 (A): Immunoblot of VPS35 in different Copper conditions:** Upper panel shows  
861 abundance of VPS35 remain unchanged in all copper conditions. Lower panel shows the same  
862 for GAPDH, as a control for cytosolic proteins. (B) **Immunoblot of VPS26 in siVPS35 HepG2:**  
863 siRNA mediated knockdown of Vps35 in HepG2 cells shows downregulation of its core partner  
864 VPS26 as compared to its control. (\*) denotes the VPS26 protein. (C) **VPS35 regulates retrieval**  
865 **of ATP7B from late endosome to TGN:** siVPS35 treated HepG2 cell shows colocalization of  
866 ATP7B (green) with Rab7 (red) in copper depletion post copper treatment for 30mins. Arrowhead  
867 shows ATP7B located in late endosomal vesicles and arrows shows non-returning vesicularized  
868 ATP7B. Scale bars represent 5µM. Blue signal represents DAPI staining for nucleus.

869 **Fig S3: Comparative dwell time analysis of ATP7B and wtVPS35 vs its mutant, VPS35**  
870 **R107A:** Live-cell time-lapse high resolution deconvolution confocal microscopy shows dwell time  
871 of GFP-ATP7B with mCherry VPS35-WT to be ≈ 4 mins (A) and for mutant ≈ 3 seconds (B) in  
872 50uM copper. Images were taken at every 1.93 s interval.

873 **Fig S4: (A) Alignment of the conserved putative sorting motifs at N-termini and C-termini**  
874 **(highlighted by red boxes) of ATP7B sequences amongst different organisms.** (B): *Table*;  
875 summarizing the results of trafficking studies of mutant ATP7B in different copper conditions.(c)  
876 **ATP7B sorting motif mutants shows mislocalized vesicular phenotype in every copper**  
877 **conditions:** Upper panel represents colocalization of C-terminal <sup>1454</sup>LLL<sup>1456</sup>>AAA mutant  
878 (green) with TGN marker, Golgin97 (red) shows vesicularized fraction of ATP7B along with its  
879 TGN localization in copper limiting (BCS), high copper and copper depletion post copper  
880 treatment . Middle panel represents C-terminal (1373-1384) three tandem YXXΦ Δ (green)

881 shows leaky vesicularized phenotype with a commendable portion to be retained on  
882 endoplasmic reticulum. Lower panel represents N-terminal N41S mutant shows vesicularized  
883 pattern in all three copper conditions. Blue signal represents DAPI staining for nucleus.  
884 Arrowhead denotes vesicularized ATP7B.

885 **Fig S5: (A) Co-purification assay to determine the interaction between domains of ATP7B**  
886 **and retromer components** (i) Empty pGEX and pGEX-N-term ATP7B were expressed in BL21  
887 and lysates were incubated with GSH beads. Coomassie stained gels showing the proteins in  
888 lysates and flow through as indicated. (ii) Empty BL21 and transformed BL21 containing  
889 pET28aSUMO with C-term ATP7B lysates were incubated with Ni-sepharose beads. Coomassie  
890 stained gels showing the proteins in lysates and flow through as indicated. (iii) and (iv) HepG2  
891 whole cell lysates were incubated with the C-term ATP7B bound Ni-sepharose beads. Eluted  
892 products were analysed by immunoblotting as indicated. (v) and (vi) HepG2 whole cell lysates  
893 were incubated with the N-term ATP7B bound GSH beads. Eluted products were analysed by  
894 immunoblotting as indicated. (B) **Co-immunoprecipitation assay to determine the interaction**  
895 **between full length ATP7B and VPS35:** Cell was transfected with GFP-ATP7B and treated  
896 with different copper conditions as mentioned. Lysates were incubated with GFP-trap beads.  
897 Untransfected cells were used as negative control. vii) Immunoblot showing the presence of  
898 GFP-ATP7B in whole cell lysates and GFP-trap beads after elution. viii) GFP-trap immune-co-  
899 precipitated products were subjected to immunoblot as indicated. Abbreviations: *FT*: Flow  
900 *through*; *WCL*: Whole cell lysate, *E*: Eluate.

901

902

903

904 Figures Fig1

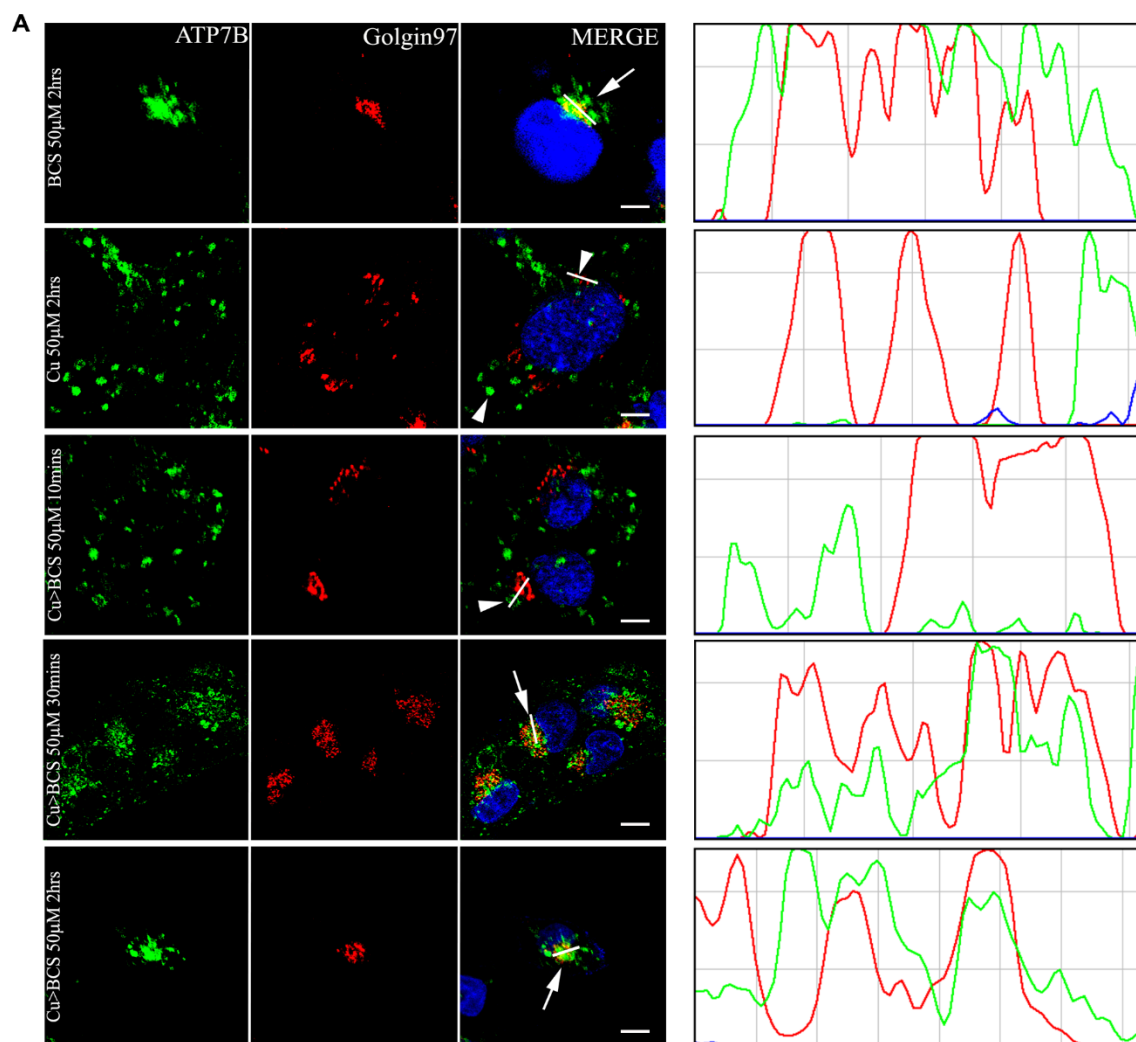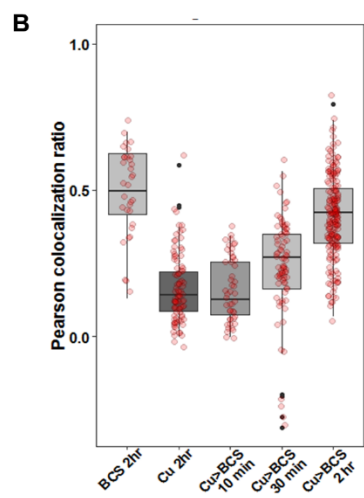

905

906 Fig. 2

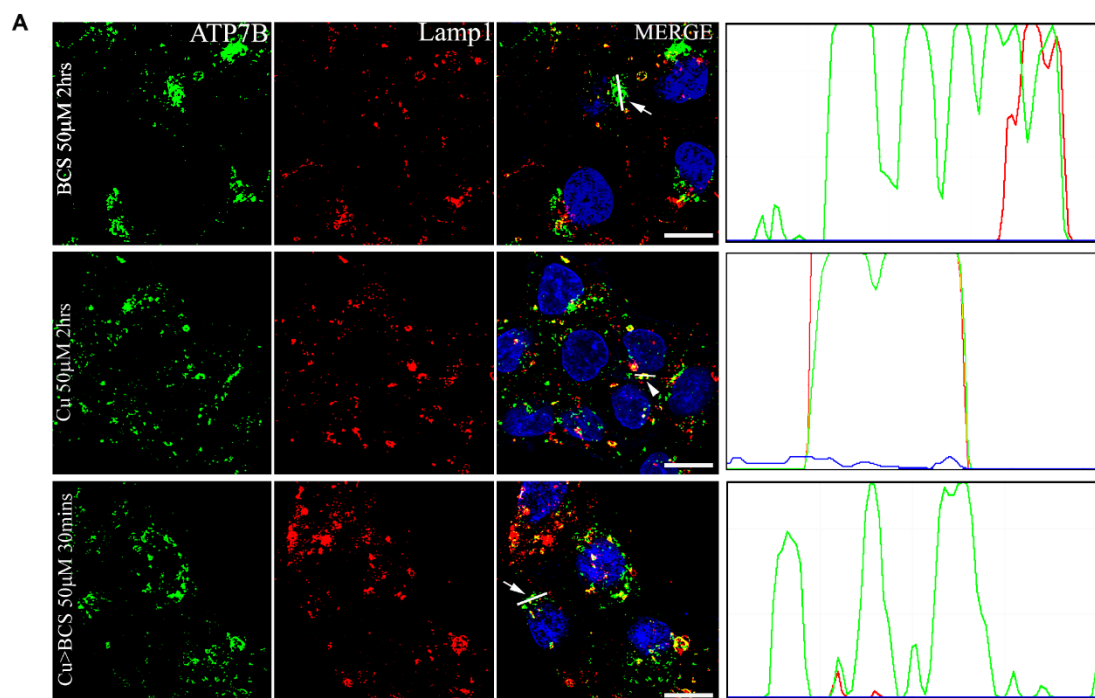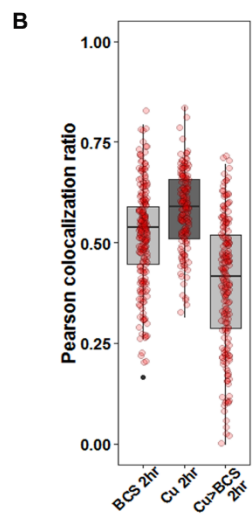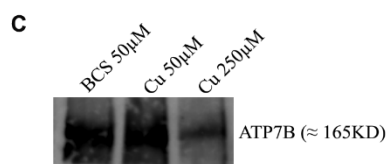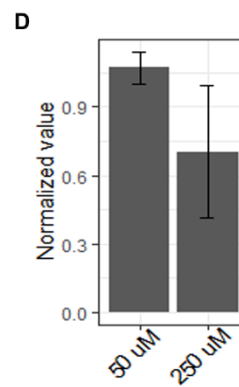

907

908

909 Fig. 3

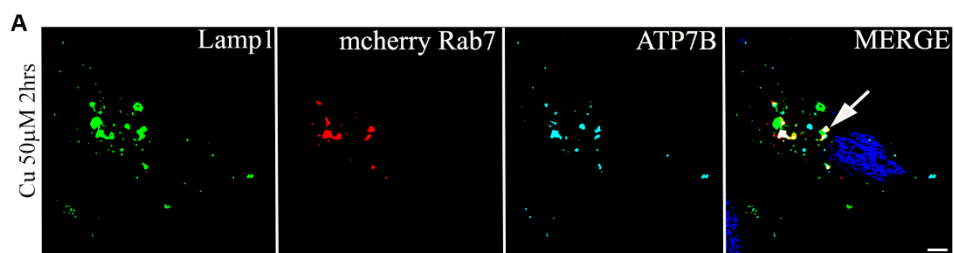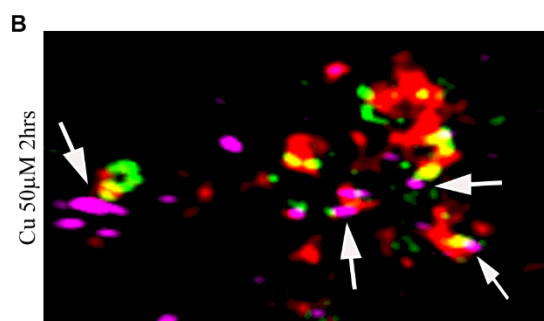

910

911

912 Fig. 4

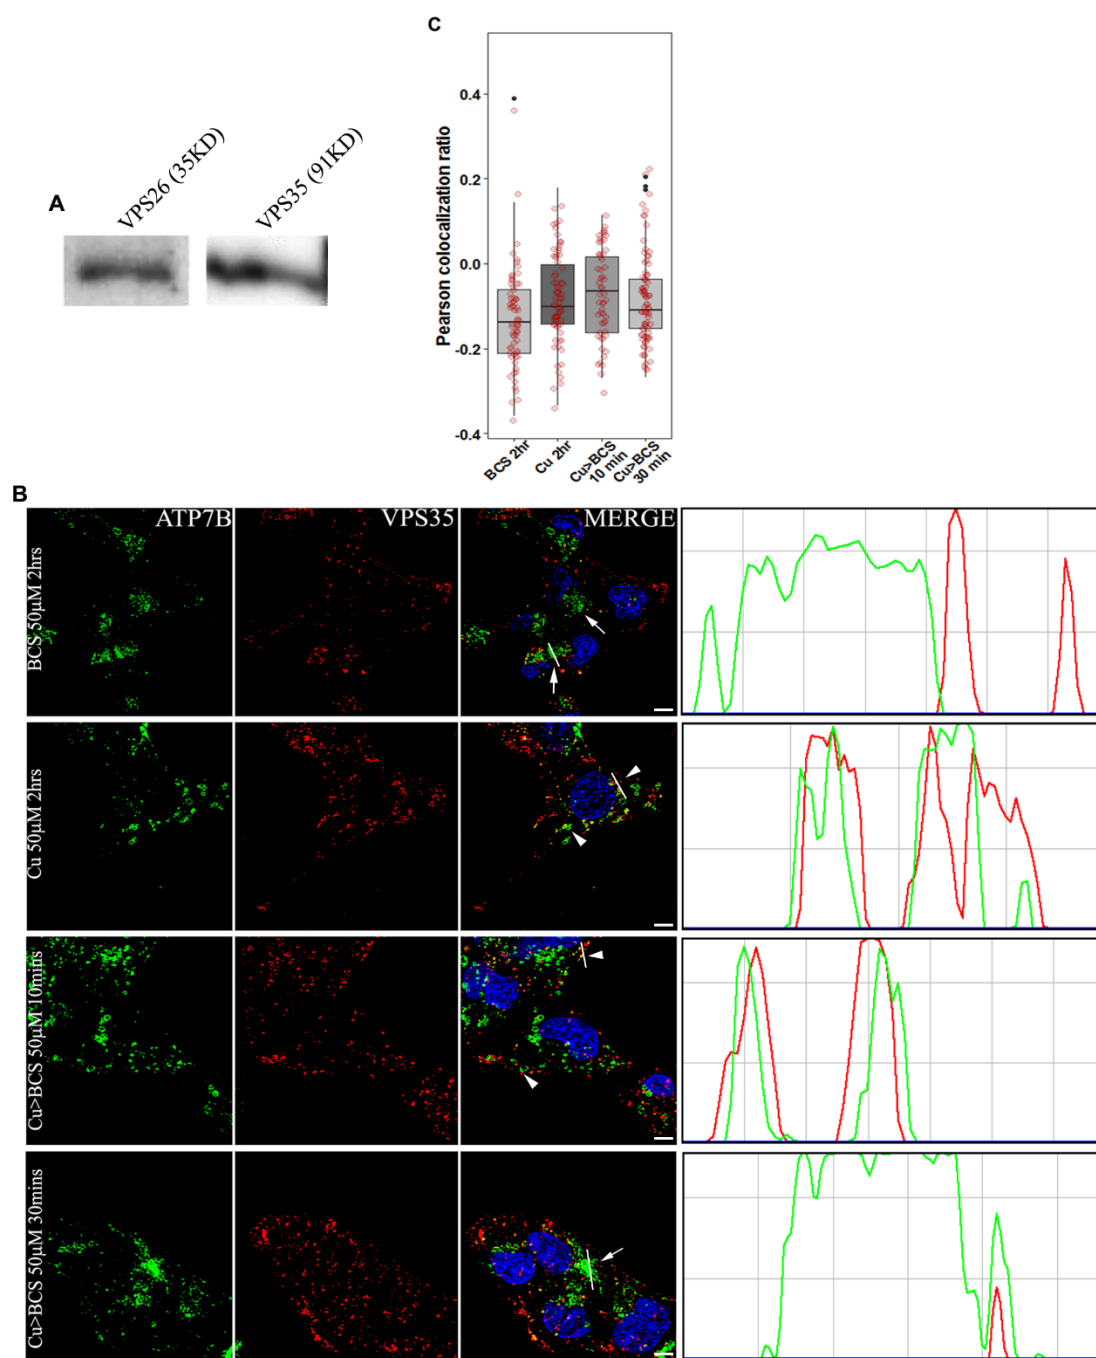

913

914

915 Fig. 5

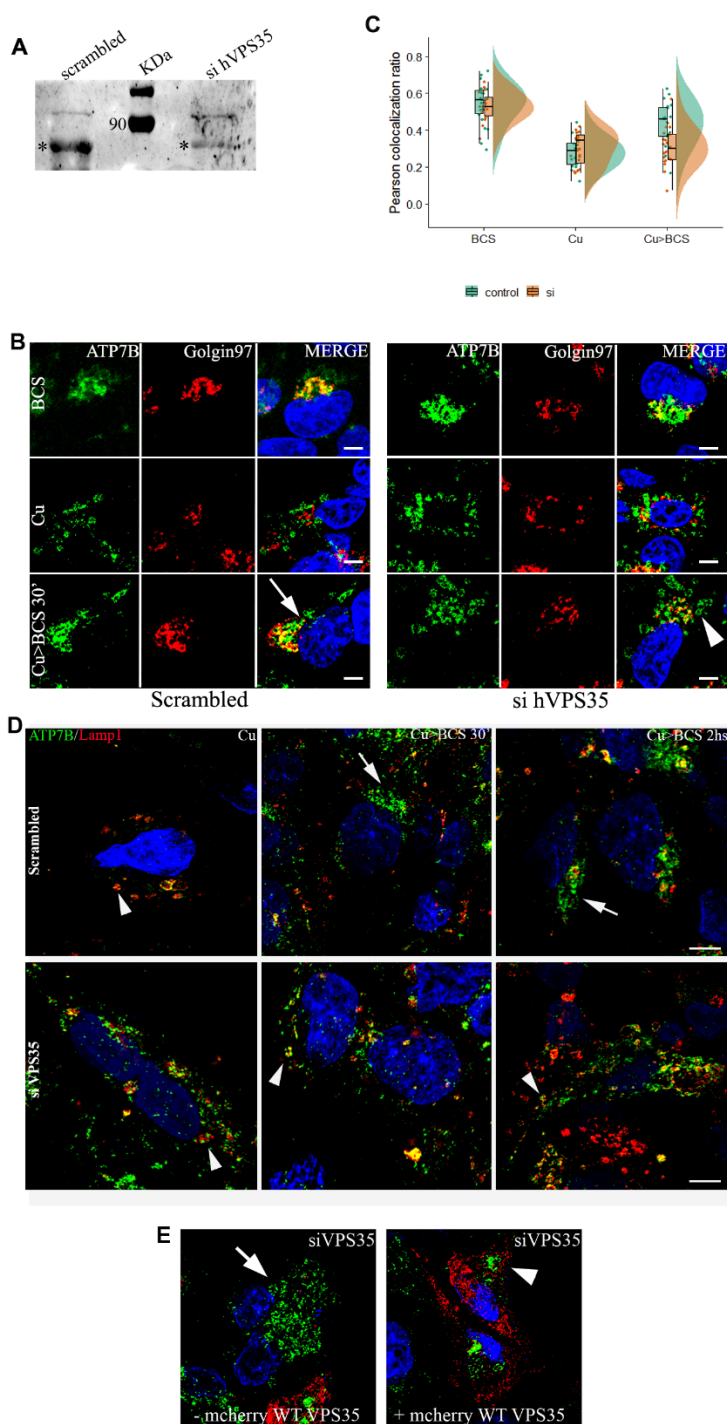

916

917

918 Fig. 6

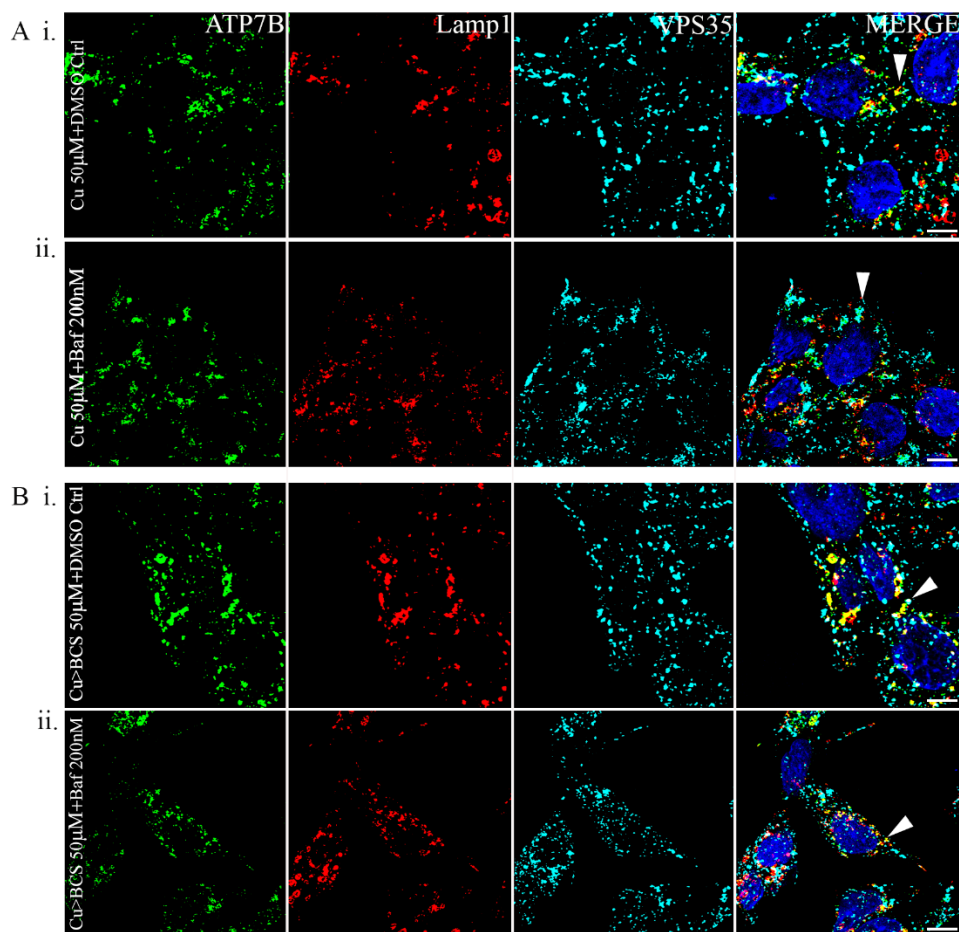

919

920



921 Fig. 7

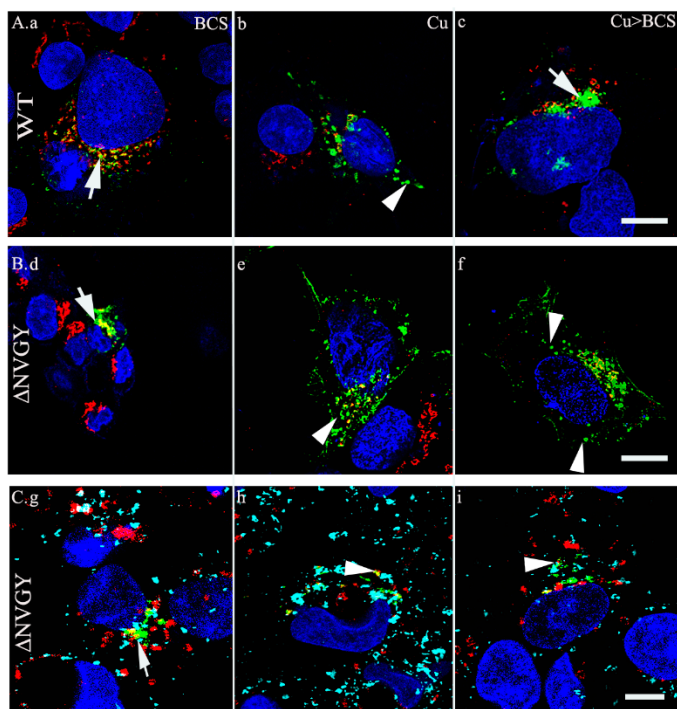

922

923

924 Fig. 8

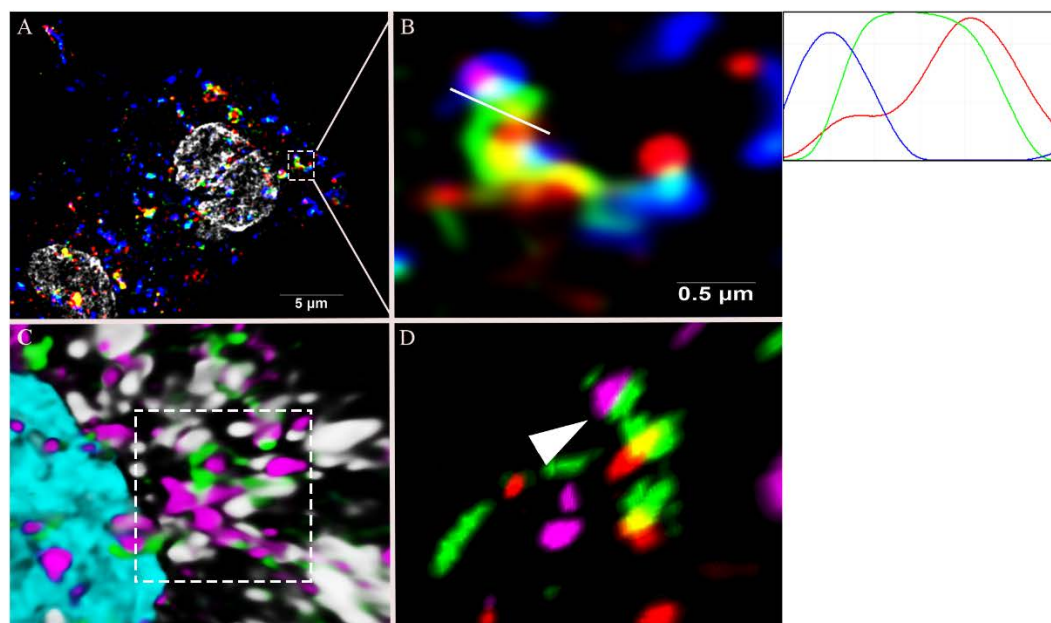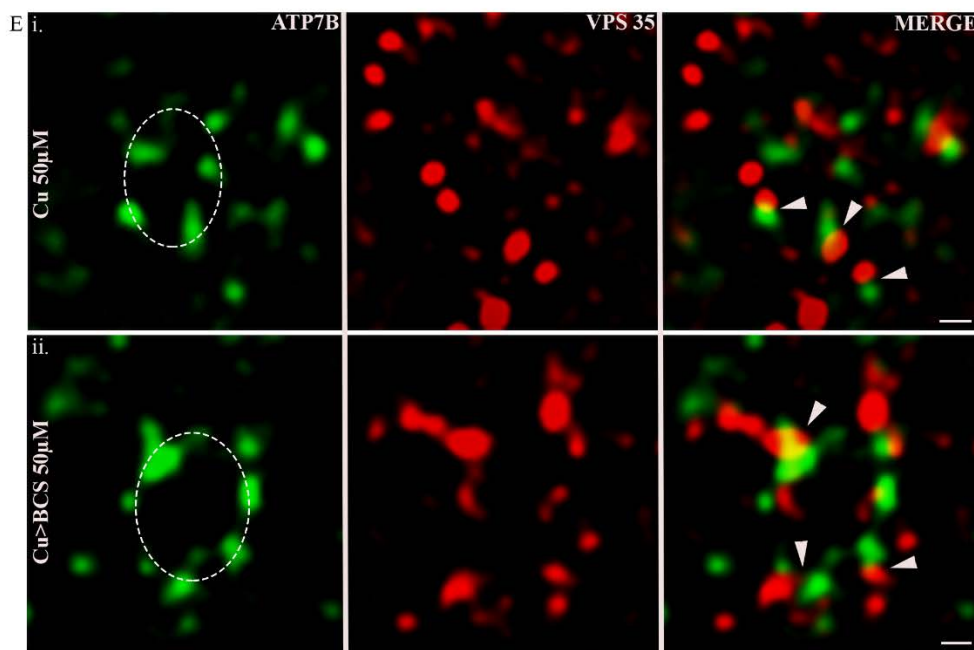

925

926

927 Fig. 9

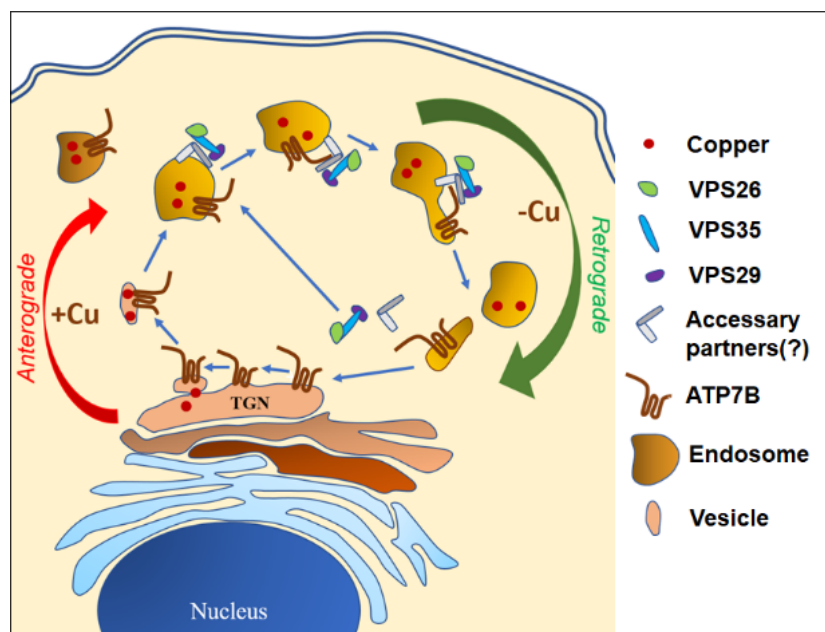

931 **Supplementary Figs**

932 **Fig. S1**

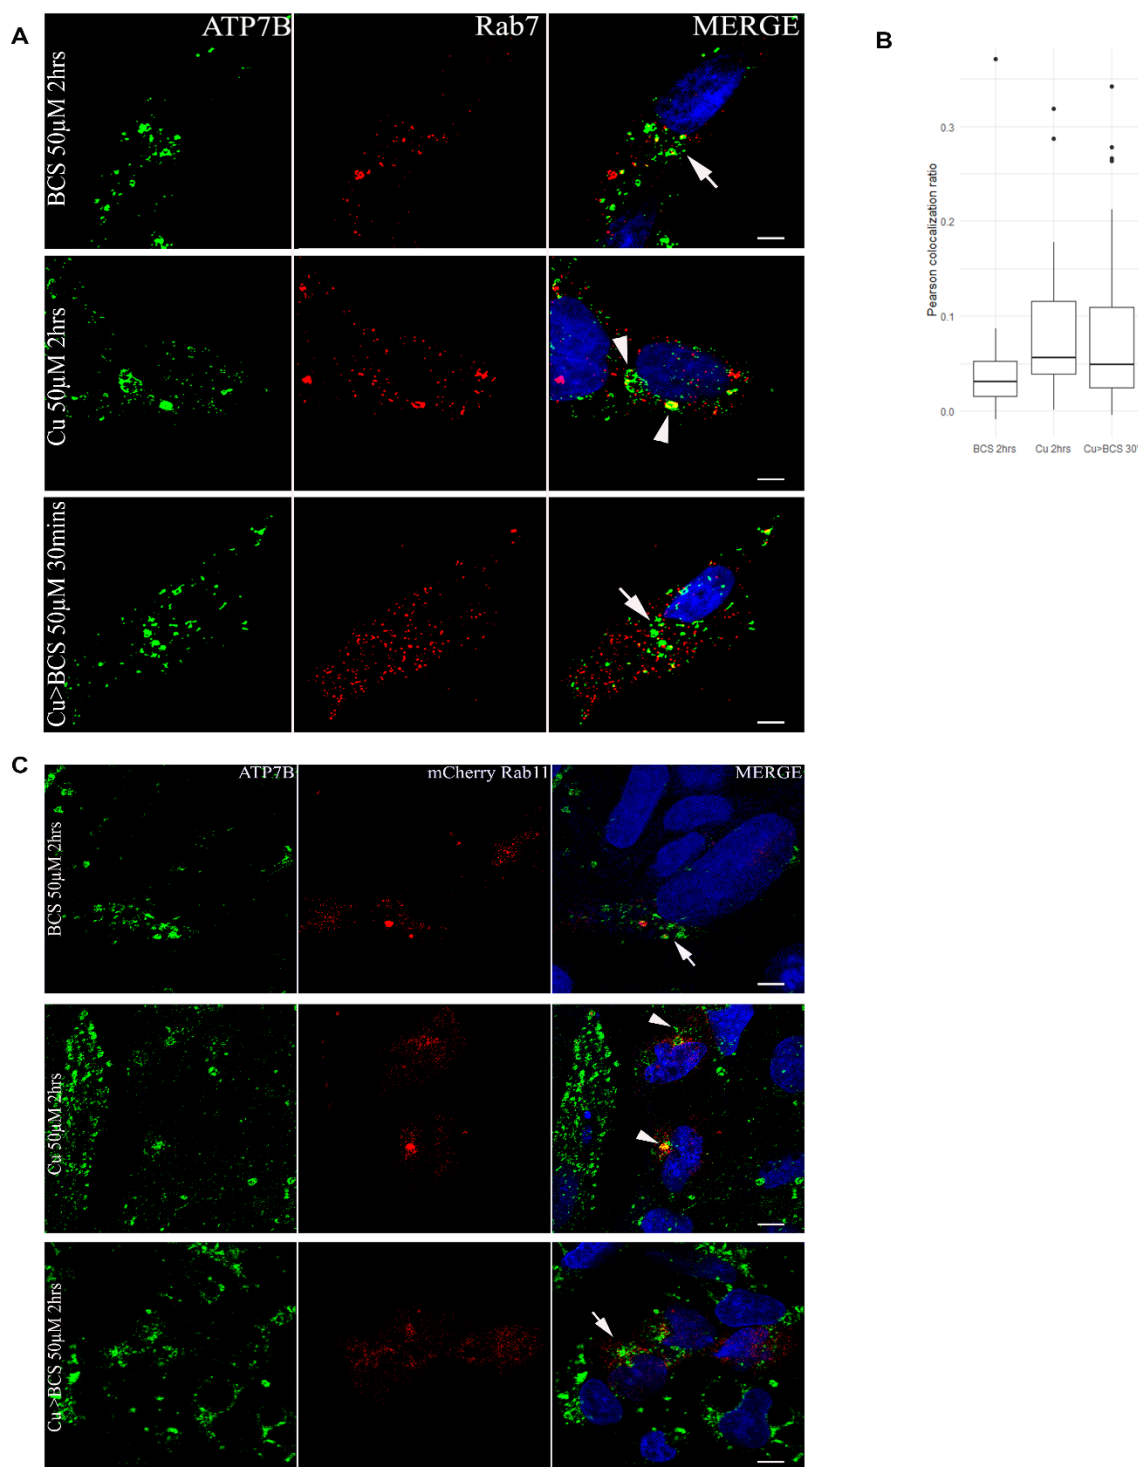

933

934

935 Fig. S2

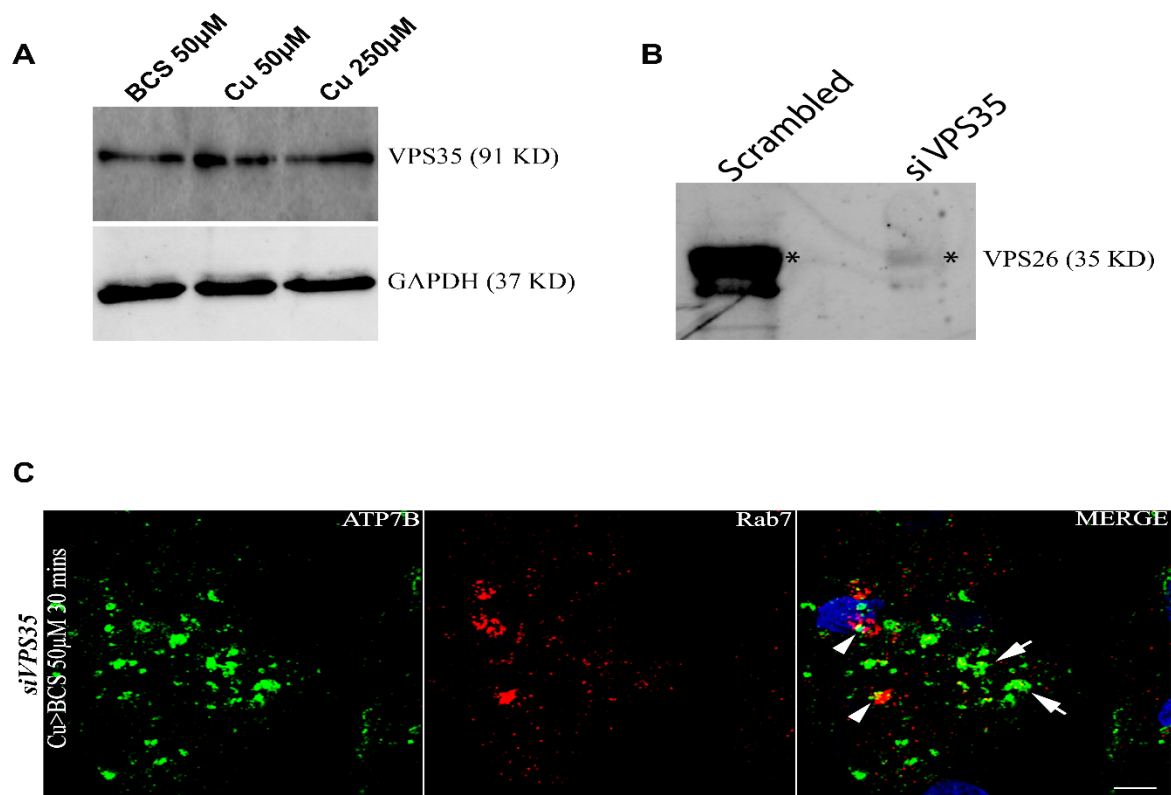

936

937

938 Fig. S3

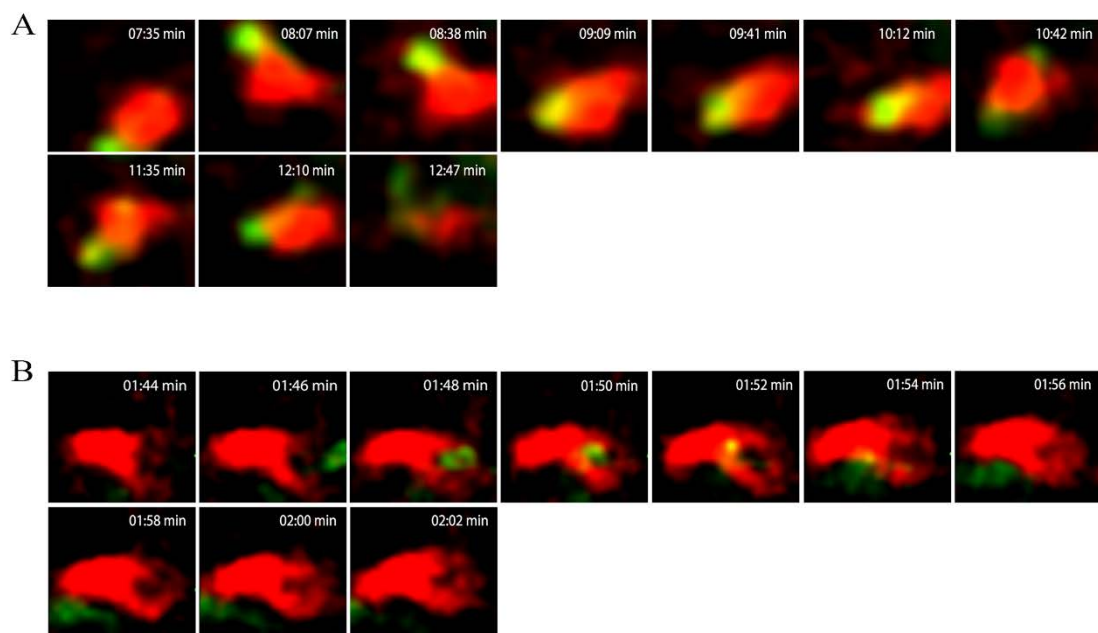

939

940

941 Fig. S4

**4A**

**N-terminal**

|                                |    |                                                                                  |     |
|--------------------------------|----|----------------------------------------------------------------------------------|-----|
| <i>Drosophila melanogaster</i> | 1  | -----MPSDERV--EATMSTVRLPIVGMTQCQSVRNITEHIGQKSGILGVRVILEENAGYF                    | 54  |
| <i>Danio rerio</i>             | 69 | ---WIPTK---HAFDNFGYE--PDGLK-----HNLV                                             | 91  |
| <i>Xenopus laevis</i>          | 43 | PVSVWKEA--KKPSAFDNRGYESPDDLCSLPD-DVGSVVVAIQGMCQSCVQSIIEGRISKVSGVVGINVCLEQNNAIIV  | 119 |
| <i>Rattus norvegicus</i>       | 24 | PTRPWQSM--KQSFADFNVGYEGGLDSTC---SSSTTTGVVSIILGMCCHSCVKSIEDRISSLKGIVSIKVSLEQGSATV | 98  |
| <i>Canis lupus familiaris</i>  | 81 | PTRAWEPVM--KQSFADFNVGYEGGLDSVC--PP-QTATSTISILGMCQSCVRSIEGRISLKGIVSIKVSLEQGNATV   | 155 |
| <i>Felis catus</i>             | 11 | PARWEPAMQQKQSFADFNVGYEGGLDSVC--PS-QTTGTISISGMCQSCVKSIEGRISLKGIVSIKVSLEQGSATV     | 87  |
| <i>Pan troglodytes</i>         | 25 | PTRAWEPAM--KQSFADFNVGYEGGLDGLG--PSSQVATSVRILGMCQSCVKSIEDRISNLKGIVSMKVSLEQGSATV   | 100 |
| <i>Homo sapiens</i>            | 25 | PTRAWEPAM--KQSFADFNVGYEGGLDGLG--PSSQVATSVRILGMCQSCVKSIEDRISNLKGIVSMKVSLEQGSATV   | 100 |

**C-terminal**

|                                |      |                                                                                |      |
|--------------------------------|------|--------------------------------------------------------------------------------|------|
| <i>Drosophila melanogaster</i> | 1083 | LSRCTVRRIRYNFFASMYNLLGIPLASGLFAPYGFLLPWMAVAMAASSVSVCSLLLLKMYRKPTAKTLRTAEYEAQ   | 1162 |
| <i>Danio rerio</i>             | 1263 | QPWMSAAMAASSVSVLSSLLLRLLFKKTSVEEYESRAQSHKLSLSPSQVSTHVGLER----RCSPLSDRKRRSRSAS  | 1337 |
| <i>Xenopus laevis</i>          | 1357 | QPWMSAAMAASSVSVLSSLLKCYRKPDSDRYEARAQGHMKPLTPSQISVHIGMDDRRDLPKTKAWDQISYISQVSR   | 1436 |
| <i>Rattus norvegicus</i>       | 1338 | QPWMSAAMAASSVSVLSSLLKCYRKPDRLERYEAQAHGRMKPLSASQVSVHVGMDRRRDSPRATPMDQVSVYVQVSL  | 1417 |
| <i>Canis lupus familiaris</i>  | 1394 | QPWMSAAMAASSVSVLSSLLKCYRKPDRLERYEAQAQGRMKPLTASQVSVHIGMDDRRRDSPRATPMDQVSVYVQVSL | 1473 |
| <i>Felis catus</i>             | 1342 | QPWMSAAMAASSVSVLSSLLKCYRKPDRLERYEAQAQGRMKPLTASQVSVHVGMDRRRDSPRATPMDQVSVYVQVSL  | 1421 |
| <i>Pan troglodytes</i>         | 1351 | QPWMSAAMAASSVSVLSSLLKCYRKPDRLERYEAQAQGHMKPLTASQVSVHIGMDDRRRDSPRATPMDQVSVYVQVSL | 1430 |
| <i>Homo sapiens</i>            | 1351 | QPWMSAAMAASSVSVLSSLLKCYRKPDRLERYEAQAQGHMKPLTASQVSVHIGMDDRRRDSPRATPMDQVSVYVQVSL | 1430 |

|                                |      |               |      |
|--------------------------------|------|---------------|------|
| <i>Drosophila melanogaster</i> | 1243 | FHANDSTELQKL  | 1254 |
| <i>Danio rerio</i>             | 1356 | ---NTSGRSIV   | 1363 |
| <i>Xenopus laevis</i>          | 1456 | LLINETHEDQMI  | 1467 |
| <i>Rattus norvegicus</i>       | 1441 | LLLSDRDEEQCI  | 1452 |
| <i>Canis lupus familiaris</i>  | 1497 | LLLNDRDEEQCI  | 1508 |
| <i>Felis catus</i>             | 1445 | LLLNDRDEEQCI  | 1456 |
| <i>Pan troglodytes</i>         | 1454 | LLLINGRDEEQYI | 1465 |
| <i>Homo sapiens</i>            | 1454 | LLLINGRDEEQYI | 1465 |

**4B**

| Domains    | Sorting Motifs        | Mutants | BCS 50µM          | Cu 50µM       | Cu > BCS (50µM) |
|------------|-----------------------|---------|-------------------|---------------|-----------------|
| N-terminal | 41NVGY44              | Δ       | TGN               | Vesicularised | Vesicularised   |
|            |                       | N41S    | TGN+Vesicularised | Vesicularised | Vesicularised   |
|            |                       | Y44V    | ER Retention      | ER Retention  | ER Retention    |
|            |                       | Y44D    | ER Retention      | ER Retention  | ER Retention    |
| C-terminal | 1377 LKCYKPKDLERY1384 | Δ       | ER Retention      | ER Retention  | ER Retention    |
|            |                       | Y1376V  | Vesicularised     | Vesicularised | Vesicularised   |
|            |                       | Y1376D  | Vesicularised     | Vesicularised | Vesicularised   |
|            | 1454 LLL1466          | LLL>AAA | Vesicularised     | Vesicularised | Vesicularised   |

**4C**

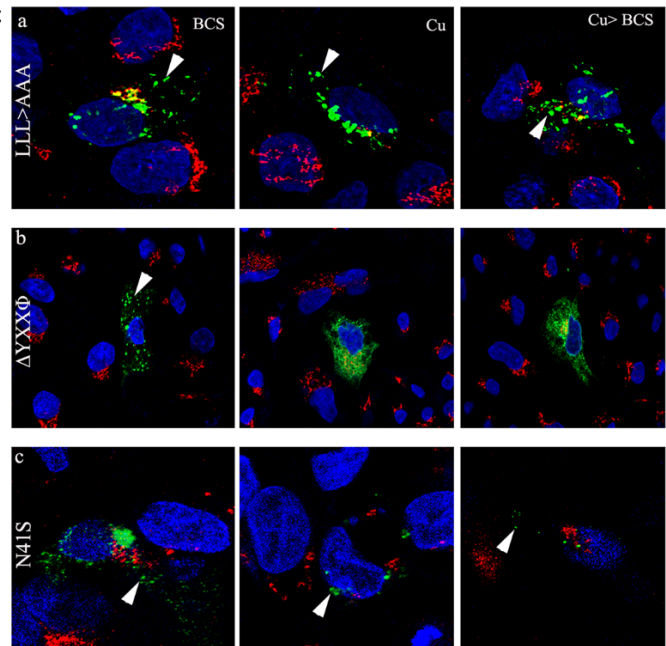

942

943



944 Fig. S5

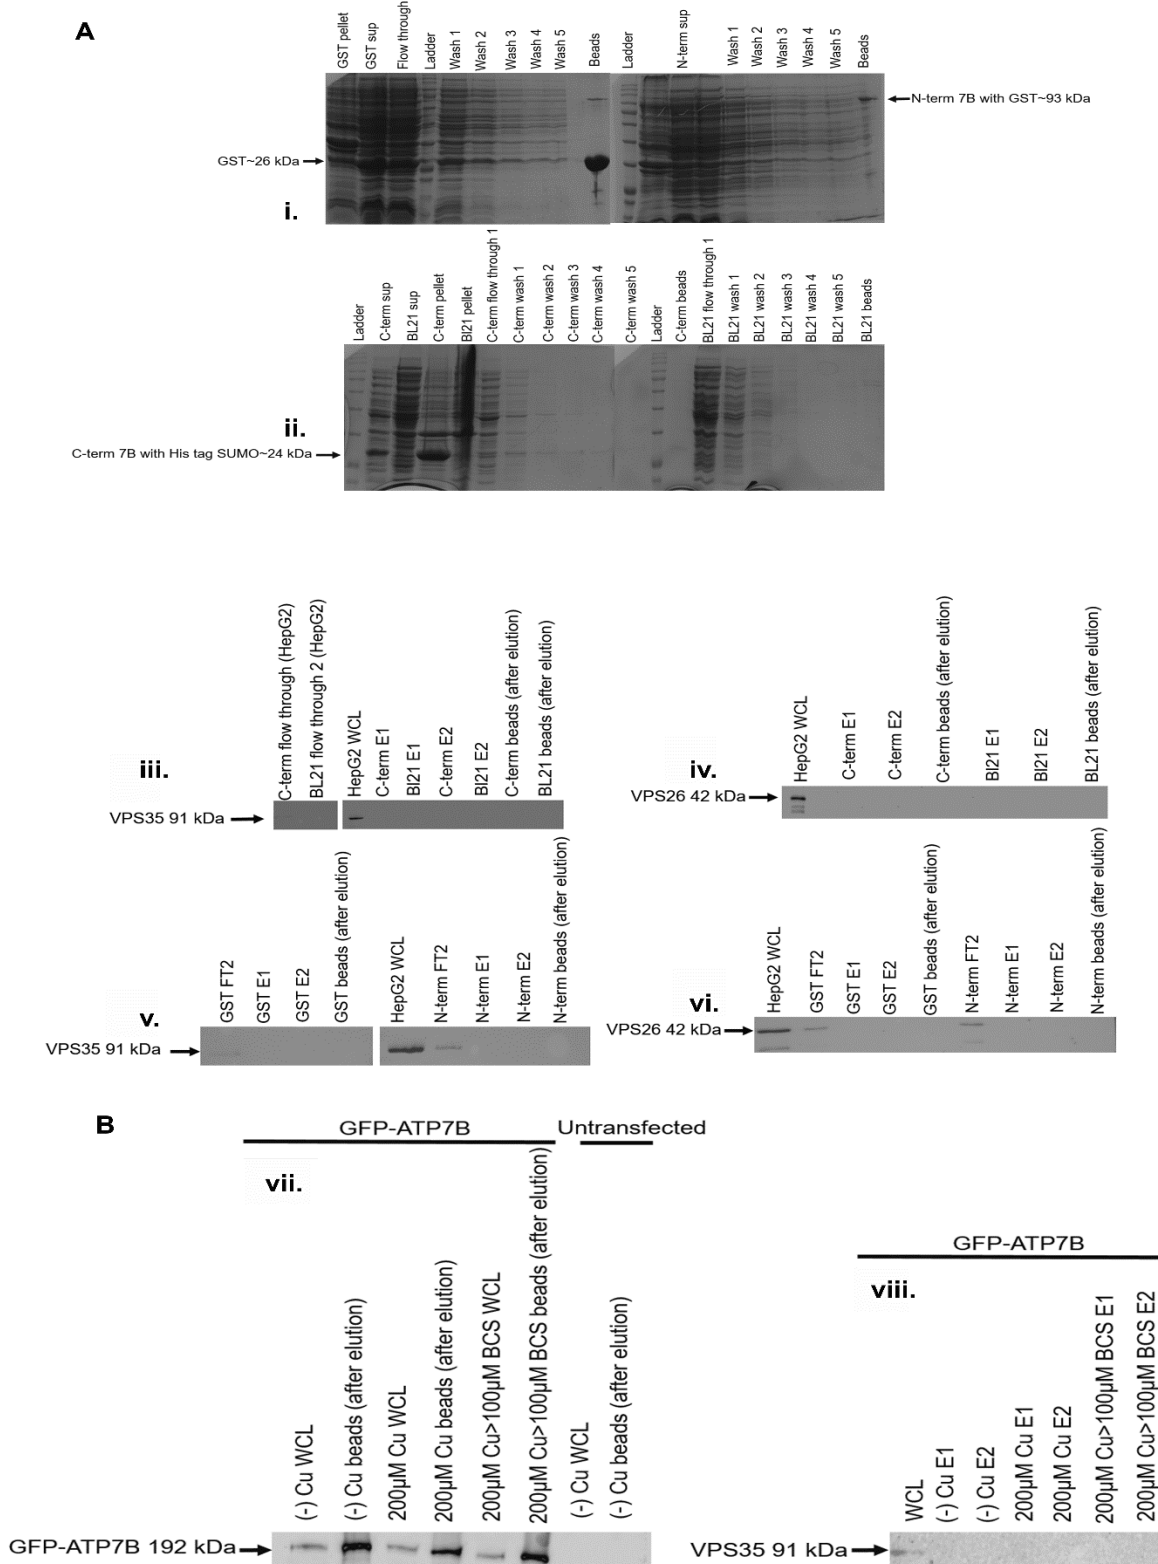

945

946
